# Supplementary material for: Development of a T Cell-Based COVID-19 Vaccine Using a Live Attenuated Influenza Vaccine Viral Vector
Source: MDPI journal article supplement (doi:10.3390/vaccines10071142), 2022-07-18
Supplement: s1 [file s1]

# Supplementary Materials

**Table S1.** A list of HLA-A\*02:01 restricted peptides used to assess T-cell immune responses to SARS-CoV-2 virus in HLA-A2.1 transgenic mice

| Nº             | Peptide     | IEDB ID | Position on protein |
|----------------|-------------|---------|---------------------|
| Peptide mix #1 |             |         |                     |
| 1              | RLNEVAKNL   | 54680   | S (1185-1193)       |
| 2              | NLNESLIDL   | 44814   | S (1192-1200)       |
| 3              | GMSRIGMEV   | 21347   | N (316-324)         |
| 4              | LALLLLDRL   | 34851   | N (219-227)         |
| 5              | LLDRLNQL    | 37473   | N (222-230)         |
| 6              | FIAGLIAIV   | 16156   | S (1220-1228)       |
| 7              | TLACFVLA AV | 64710   | M (61-70)           |
| 8              | VVFLHVTYV   | 71663   | S (1060-1068)       |
| Peptide mix #2 |             |         |                     |
| 9              | FLWLLWPVT   | 16972   | M (53-61)           |
| 10             | FVLA AVYRI  | 18219   | M (65-73)           |
| 11             | AQFAPSASA   | 3956    | N (305-313)         |
| 12             | ALNTPKDHI   | 2802    | N (138-146)         |
| 13             | LQLPQGTTL   | 38881   | N (159-167)         |
| 14             | ILLNKHIDA   | 27182   | N (351-359)         |
| 15             | ALNTLVKQL   | 2801    | S (958-966)         |
| 16             | VLNDILSRL   | 69657   | S (976-984)         |
| 17             | LITGRLQSL   | 36724   | S (996-1004)        |

**Table S2.** Demographic characteristics of COVID-19 patients who donated whole blood for this study

| # of PBMC specimen | Sex | Age, years | Disease severity | Time post symptoms onset |
|--------------------|-----|------------|------------------|--------------------------|
| 1                  | M   | 31         | mild             | 4 months                 |
| 2                  | M   | 26         | moderate         | 3 months                 |
| 3                  | F   | 28         | mild             | 3 months                 |
| 4                  | M   | 31         | mild             | 2 months                 |
| 5                  | F   | 46         | severe           | 2 months                 |
| 6                  | F   | 25         | mild             | 2 months                 |
| 7                  | F   | 41         | severe           | 3 months                 |
| 8                  | F   | 39         | moderate         | 3 months                 |
| 9                  | M   | 39         | mild             | 1 months                 |
| 10                 | F   | 47         | severe           | 2 months                 |
| 11                 | M   | 34         | mild             | 3 months                 |
| 12                 | F   | 30         | mild             | 3 months                 |
| 13                 | M   | 30         | mild             | 3 months                 |
| 14                 | F   | 31         | mild             | 5 months                 |
| 15                 | F   | 45         | mild             | 1 months                 |
| 16                 | M   | 47         | mild             | 1 months                 |
| 17                 | F   | 18         | mild             | 1 months                 |
| 18                 | F   | 39         | moderate         | 2 months                 |
| 19                 | F   | 30         | mild             | 2 months                 |
| 20                 | M   | 30         | mild             | 2 months                 |

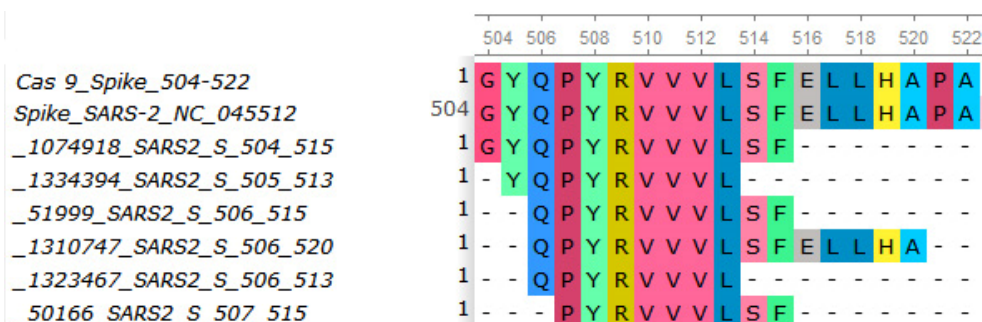

**Figure S1.** 504-522 fragment of spike protein aligned with peptides established as immunogenic/MHC molecule binding epitopes in experimental studies. This fragment is a part of cassette #9. Epitopes' IDs in Immune Epitope Database are indicated on the left. References and additional information regarding these epitopes are listed in Table S3. This fragment of spike protein was predicted to be involved in interaction with ACE receptor [1].

**Table S3.** Epitopes in 504-522 fragment of spike protein, deposited in IEDB, additional information and references

| Epitope ID | Epitope sequence     | Protein (position) | Assay type | Allele                                                   | Assay                                                                   | Ref |
|------------|----------------------|--------------------|------------|----------------------------------------------------------|-------------------------------------------------------------------------|-----|
| 1074918    | GYQPYRVVLSF          | S (504-515)        | T-cell     | HLA class I                                              | biological activity activation                                          | [2] |
|            |                      |                    | B-cell     |                                                          | Microarray qualitative binding (negative)                               | [3] |
| 1334394    | YQPYRVVVL            | S (505-513)        | T-cell     | HLA-C*06:02                                              | multimer/tetramer qualitative binding                                   | [4] |
| 51999      | QPYRVVLSF            | S (506-515)        | T-cell     | HLA-B*07:02                                              | biological activity activation                                          | [5] |
|            |                      |                    | MHC        | HLA-B*07:02<br>HLA-B*53:01                               | purified MHC/competitive/radioactivity dissociation constant KD (~IC50) | [6] |
| 1310747    | QPYRVVLSFELL HA      | S (506-520)        | T-cell     | HLA-DQB1*05:03<br>HLA-DRB1*14:01                         | biological activity activation                                          | [5] |
| 1323467    | QPYRVVVL             | S (506-513)        |            | HLA class I, II                                          | ICS IFN $\gamma$ release                                                | [7] |
| 50166      | PYRVVLSF             | S (507-515)        | T-cell     | HLA-A*24:02                                              | ICS IFN $\gamma$ release                                                | [8] |
|            |                      |                    | MHC        | HLA-A*24:02                                              | cellular MHC/competitive/fluorescence qualitative binding               | [8] |
|            |                      |                    | MHC        | HLA-A*23:01<br>HLA-A*24:02<br>HLA-A*26:01<br>HLA-A*01:01 | purified MHC/competitive/radioactivity dissociation constant KD (~IC50) | [6] |
| 1542166    | QPYRVVLSFELL HAPATVC | S (506-525)        | T-cell     | HLA class II                                             | 3H-thymidine proliferation                                              | [9] |

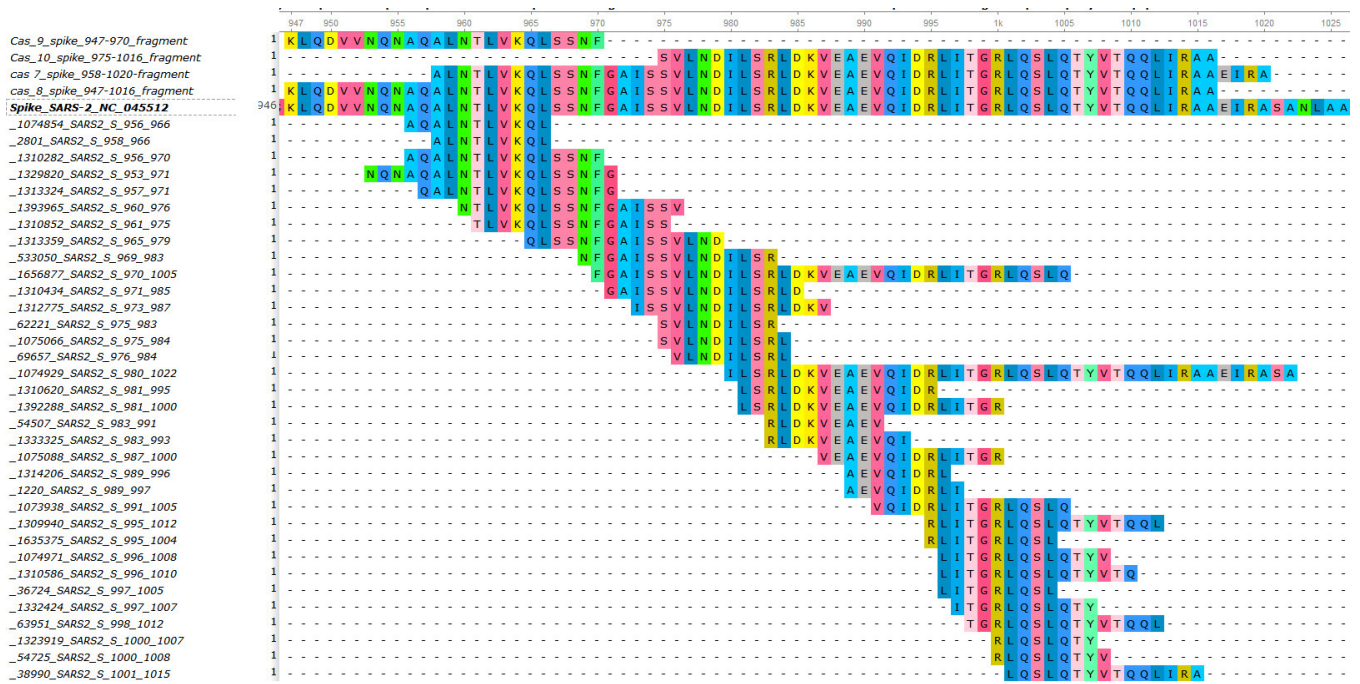

**Figure S2.** 947-1020 fragment of spike protein aligned with peptides established as immunogenic/MHC molecule binding epitopes in experimental studies. This fragment is a part of cassettes #7, #8, #9, #10. Epitopes' IDs in Immune Epitope Database are indicated on the left. References and additional information regarding these epitopes are listed in Table S4.

This long fragment starts in a heptad repeat 1 and includes a part of central helix [10].

**Table S4.** Epitopes in 947-1020 fragment of spike protein, deposited in IEDB, additional information and references

| Epitope ID | Epitope sequence        | Protein (position) | Assay type | Allele          | Assay                                                                                               | Ref     |
|------------|-------------------------|--------------------|------------|-----------------|-----------------------------------------------------------------------------------------------------|---------|
| 1310448    | GKLQDVVNQNAQALN         | S (946-960)        | T-cell     | HLA class I, II | ICS IFN $\gamma$ release                                                                            | [7]     |
| 1329820    | NQNAQALNTLVKQLS<br>SNFG | S (953-971)        | T-cell     | HLA class II    | Infectious disease via exposure to SARS-CoV2 (Source Organism) followed by restimulation in vitro   | [11]    |
|            |                         |                    | MHC        | HLA class II    | cellular MHC/mass spectrometry ligand presentation                                                  | [12]    |
| 1074854    | AQALNTLVKQL             | S (956-966)        | T-cell     | HLA class I     | biological activity activation                                                                      | [2]     |
| 1310282    | AQALNTLVKQLSSNF         | S (956-970)        | T-cell     | HLA class II    | ELISPOT IFN $\gamma$ release                                                                        | [13]    |
|            |                         |                    | MHC        | HLA class II    | cellular MHC/mass spectrometry ligand presentation                                                  | [12]    |
| 1313324    | QALNTLVKQLSSNFG         | S (957-971)        | T-cell     | HLA class II    | biological activity activation                                                                      | [14]    |
| 2801       | ALNTLVKQL               | S (958-966)        | T-cell     | HLA-A*02:01     | multimer/tetramer qualitative binding                                                               | [15,16] |
|            |                         |                    | T-cell     | HLA-A*02:01     | ICS TNFa, IFN $\gamma$ release                                                                      | [15,17] |
|            |                         |                    | T-cell     | HLA-A*02:01     | 51 chromium cytotoxicity                                                                            | [18]    |
|            |                         |                    | T-cell     | HLA-A*02:01     | biological activity activation<br>biological activity degranulation<br>ELISPOT IFN $\gamma$ release | [15]    |
|            |                         |                    | MHC        | HLA-A*02:01     | cellular MHC/direct/fluorescence qualitative binding                                                |         |
| 1393965    | NTLVKQLSSNFGAIISSV      | S (960-976)        | T-cell     | HLA-DRB3*02:02  | ELISPOT IFN $\gamma$ release                                                                        | [19]    |

| Epitope ID | Epitope sequence                            | Protein (position) | Assay type | Allele                                                                                 | Assay                                                                                                                                                                                                                       | Ref                |
|------------|---------------------------------------------|--------------------|------------|----------------------------------------------------------------------------------------|-----------------------------------------------------------------------------------------------------------------------------------------------------------------------------------------------------------------------------|--------------------|
|            |                                             |                    | MHC        | HLA-DRA*01:01/DRB1*04:01                                                               | cellular MHC/competitive/fluorescence qualitative binding                                                                                                                                                                   | [20]               |
| 1310852    | TLVKQLSSNFGAISS                             | S (961-975)        | T-cell     | HLA class II                                                                           | ELISPOT IFN $\gamma$ release                                                                                                                                                                                                | [13]               |
| 1313359    | QLSSNFGAISSVLND                             | S (965-979)        | T-cell     | HLA class II                                                                           | ELISA IFN $\gamma$ release                                                                                                                                                                                                  | [11]               |
|            |                                             |                    | B-cell     |                                                                                        | ELISA qualitative binding                                                                                                                                                                                                   | [21]               |
| 533050     | NFGAISSVLNDILSR                             | S (969-983)        | T-cell     | HLA class II                                                                           | biological activity activation                                                                                                                                                                                              | [14]               |
| 1656877    | FGAISSVLNDILSRDKVEAEVQIDRLITGRLQSLQ         | S (970-1005)       | T-cell     | HLA class I                                                                            | biological activity activation                                                                                                                                                                                              | [22]               |
| 1310434    | GAISSVLNDILSRDL                             | S (971-985)        | T-cell     | HLA class II                                                                           | ELISPOT IFN $\gamma$ release                                                                                                                                                                                                | [13]               |
|            |                                             |                    | B-cell     |                                                                                        | ELISA qualitative binding                                                                                                                                                                                                   | [21]               |
| 1312775    | ISSVLNDILSRDLKV                             | S (973-987)        | T-cell     | HLA class II                                                                           | biological activity activation                                                                                                                                                                                              | [14]               |
|            |                                             |                    | B-cell     |                                                                                        | ELISA qualitative binding                                                                                                                                                                                                   | [21]               |
| 62221      | SVLNDILSR                                   | S (975-983)        | T-cell     | HLA-A*68:01                                                                            | biological activity activation                                                                                                                                                                                              | [5]                |
|            |                                             |                    | MHC        | HLA-A*11:01<br>HLA-A*68:01<br>HLA-A*31:01                                              | purified MHC/competitive/radioactivity dissociation constant KD (~IC50)                                                                                                                                                     | [6]                |
| 1075066    | SVLNDILSR                                   | S (975-984)        | T-cell     | HLA class I                                                                            | biological activity activation                                                                                                                                                                                              | [2]                |
| 69657      | VLNDILSR                                    | S (976-984)        | MHC        | HLA-A*02:01                                                                            | cellular MHC/direct/fluorescence qualitative binding                                                                                                                                                                        | [8,15,18,23-27]    |
|            |                                             |                    | T-cell     | HLA-A*02:01                                                                            | multimer/tetramer qualitative binding ICS TNF $\alpha$ , IFN $\gamma$ release<br>ELISPOT IFN $\gamma$ release<br>biological activity degranulation<br>51 chromium cytotoxicity                                              | [4,15,16,18,28,29] |
| 1074929    | ILSRDLKVEAEVQIDRLITGRLQSLQTYVTQQLIRAAEIRASA | S (980-1022)       | T-cell     | HLA class I                                                                            | biological activity activation                                                                                                                                                                                              | [2]                |
| 1310620    | LSRLDKVEAEVQIDR                             | S (981-995)        | T-cell     | HLA class II                                                                           | 3H-thymidine proliferation                                                                                                                                                                                                  | [9]                |
|            |                                             |                    | B-cell     |                                                                                        | ELISA qualitative binding                                                                                                                                                                                                   | [21]               |
| 1392288    | LSRLDKVEAEVQIDRLITGR                        | S (981-1000)       | T-cell     | HLA class II                                                                           | 3H-thymidine proliferation                                                                                                                                                                                                  | [9]                |
| 54507      | RLDKVEAEV                                   | S (983-991)        | T-cell     | HLA-A*02:01                                                                            | biological activity activation<br>CFSE proliferation<br>ELISPOT IFN $\gamma$ release<br>ICS IFN $\gamma$ release<br>multimer/tetramer qualitative binding                                                                   | [2,4,8,30,31]      |
|            |                                             |                    | MHC        | HLA-A*02:01<br>HLA-A*02:02<br>HLA-A*02:03<br>HLA-A*02:06<br>HLA-A*02:07<br>HLA-A*68:02 | cellular MHC/competitive/fluorescence qualitative binding<br>purified MHC/competitive/radioactivity dissociation constant KD (~IC50)<br>purified MHC/competitive/radioactivity half maximal inhibitory concentration (IC50) | [6,8,27,32]        |
| 1333325    | RLDKVEAEVQI                                 | S (983-993)        | T-cell     | HLA-A*02:01                                                                            | multimer/tetramer qualitative binding                                                                                                                                                                                       | [4]                |
| 1075088    | VEAEVQIDRLITGR                              | S (987-1000)       | T-cell     | HLA class I                                                                            | biological activity activation                                                                                                                                                                                              | [2]                |
| 1220       | AEVQIDRLI                                   | S (989-997)        | T-cell     | HLA-B*44:02<br>HLA-B*44:03                                                             | biological activity activation<br>multimer/tetramer qualitative binding                                                                                                                                                     | [2,33]             |



| Epitope ID | Epitope sequence       | Protein (position) | Assay type | Allele                                                   | Assay                                                                                                                                                                                                                                                             | Ref                     |
|------------|------------------------|--------------------|------------|----------------------------------------------------------|-------------------------------------------------------------------------------------------------------------------------------------------------------------------------------------------------------------------------------------------------------------------|-------------------------|
|            |                        |                    | MHC        | HLA-B*44:03<br>HLA-B*44:02<br>HLA-B*40:02<br>HLA-B*45:01 | purified MHC/competitive/radioactivity half maximal inhibitory concentration (IC50)                                                                                                                                                                               | [6]                     |
| 1314206    | AEVQIDRL               | S (989-996)        | T-cell     | HLA-B*40:01                                              | biological activity activation                                                                                                                                                                                                                                    | [5]                     |
| 1073938    | VQIDRLITGRLQSLQ        | S (991-1005)       | T-cell     | HLA class II                                             | ELISPOT IFN $\gamma$ release                                                                                                                                                                                                                                      | [13]                    |
| 1309940    | RLITGRLQSLQTYVTQQ<br>L | S (995-1012)       | T-cell     | HLA class I                                              | ICS IFN $\gamma$ release                                                                                                                                                                                                                                          | [35]                    |
| 1635375    | RLITGRLQSL             | S (995-1004)       | T-cell     | HLA-A*02:01                                              | multimer/tetramer qualitative binding                                                                                                                                                                                                                             | [31]                    |
| 1074971    | LITGRLQSLQTYV          | S (996-1008)       | T-cell     | HLA class I                                              | biological activity activation                                                                                                                                                                                                                                    | [2]                     |
| 1310586    | LITGRLQSLQTYVTQ        | S (996-1010)       | T-cell     | HLA class II                                             | ELISPOT IFN $\gamma$ , IL-5 release                                                                                                                                                                                                                               | [13]                    |
| 36724      | LITGRLQSL              | S (997-1005)       | T-cell     | HLA-A*02:01                                              | multimer/tetramer qualitative binding<br>ICS IFN $\gamma$ release<br>ELISPOT IFN $\gamma$ release                                                                                                                                                                 | [16,26,36–38]           |
| 1332424    | ITGRLQSLQTY            | S (997-1007)       | T-cell     | HLA-A*01:01                                              | multimer/tetramer qualitative binding                                                                                                                                                                                                                             | [4]                     |
| 63951      | TGRLQSLQTYVTQQL        | S (998-1012)       | T-cell     | n/d                                                      | ELISPOT IFN $\gamma$ release                                                                                                                                                                                                                                      | [39]                    |
|            |                        |                    | MHC        | HLA-DRB1*01:01                                           | purified MHC/competitive/radioactivity half maximal inhibitory concentration (IC50)                                                                                                                                                                               | [40]                    |
| 54725      | RLQSLQTYV              | S (1000-1008)      | T-cell     | HLA-A*02:01                                              | surface plasmon resonance (SPR) dissociation constant KD<br>multimer/tetramer qualitative binding<br>ICS TNF $\alpha$ IFN $\gamma$ release<br>ELISPOT IFN $\gamma$ release<br>biological activity degranulation<br>biological activity activation                 | [2,15,16,41,42]         |
|            |                        |                    | T-cell     | HLA-A*02:03                                              | ICS IFN $\gamma$ release                                                                                                                                                                                                                                          | [8]                     |
|            |                        |                    | MHC        | HLA-A*02:01<br>HLA-A*02:03<br>HLA-A*02:06<br>HLA-A*68:02 | purified MHC/competitive/radioactivity half maximal inhibitory concentration (IC50)<br>purified MHC/competitive/radioactivity dissociation constant KD (~IC50)<br>cellular MHC/competitive/fluorescence qualitative binding<br>x-ray crystallography 3D structure | [6,8,15,25,26,32,36,42] |
| 1323919    | RLQSLQTY               | S (1000-1007)      | T-cell     | HLA-B*15:01                                              | biological activity activation                                                                                                                                                                                                                                    | [5]                     |
| 38990      | LQSLQTYVTQQLIRA        | S (1001-1015)      | T-cell     | HLA class II                                             | biological activity activation                                                                                                                                                                                                                                    | [14]                    |
|            |                        |                    | MHC        | HLA-DRB1*01:01                                           | purified MHC/competitive/radioactivity dissociation constant KD (~IC50)                                                                                                                                                                                           | [40]                    |

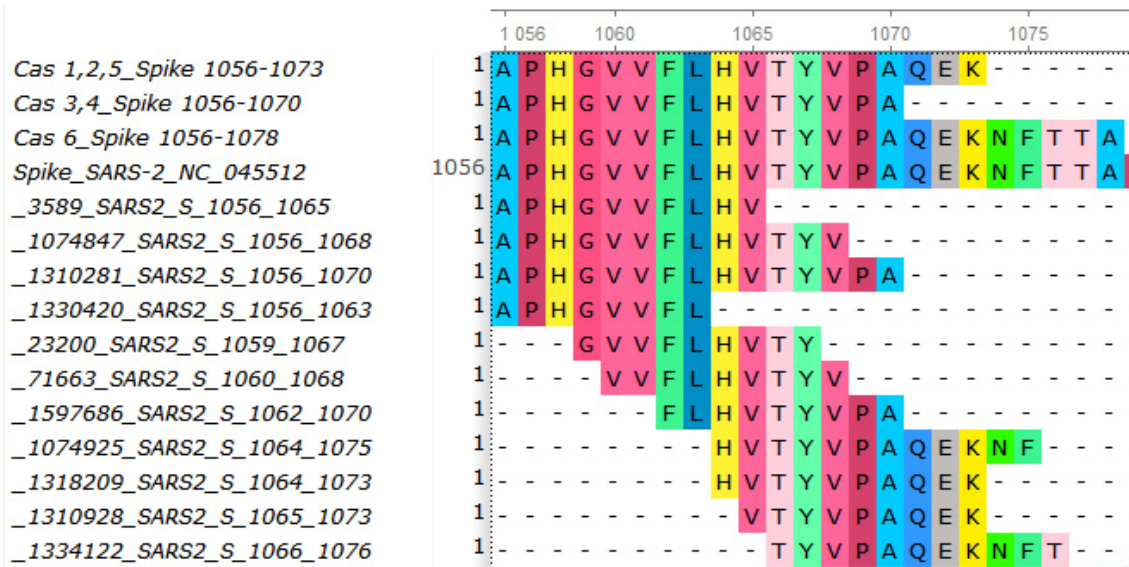

**Figure S3.** 1056-1078 fragment of spike protein aligned with peptides established as immunogenic/MHC molecule binding epitopes in experimental studies. This fragment is a part of cassettes #1-6. Epitopes' IDs in Immune Epitope Database are indicated on the left. References and additional information regarding these epitopes are listed in Table S5.

This fragment corresponds to connector domain and flanking regions [10].

**Table S5.** Epitopes in 1056-1078 fragment of spike protein, deposited in IEDB, additional information and references.

| Epitope ID | Epitope sequence | Protein (position) | Assay type | Allele         | Assay                                                                                                                             | Ref                |
|------------|------------------|--------------------|------------|----------------|-----------------------------------------------------------------------------------------------------------------------------------|--------------------|
| 3589       | APHGVVFLHV       | S (1056-1065)      | T-cell     | HLA-B*07:02    | multimer/tetramer qualitative binding                                                                                             | [4]                |
|            |                  |                    | MHC        | HLA-B*54:01    | purified MHC/competitive/radioactivity dissociation constant KD (~IC50)                                                           | [6]                |
|            |                  |                    |            | HLA-B*07:02    |                                                                                                                                   |                    |
|            |                  |                    |            | HLA-B*35:01    |                                                                                                                                   |                    |
| 1074847    | APHGVVFLHVTYV    | S 1056-1068)       | T-cell     | HLA class I    | biological activity activation                                                                                                    |                    |
| 1310281    | APHGVVFLHVTYVPA  | S (1056-1070)      | T-cell     | HLA class II   | biological activity activation ELISPOT                                                                                            | [5,13]             |
|            |                  |                    | T-cell     | HLA-DRB1*12:01 | biological activity activation                                                                                                    |                    |
| 1330420    | APHGVVFL         | S (1056-1063)      | T-cell     | HLA-B*07:02    | multimer/tetramer qualitative binding                                                                                             | [43]               |
| 23200      | GVVFLHVTY        | S (1059-1067)      | T-cell     | HLA-A*32:01    | biological activity activation                                                                                                    | [5]                |
|            |                  |                    | MHC        | HLA-A*11:01    | purified MHC/competitive/radioactivity dissociation constant KD (~IC50)                                                           | [6]                |
| 71663      | VVFLHVTYV        | S (1060-1068)      | T-cell     | HLA-A*02:01    | biological activity activation<br>ELISA IFN $\gamma$ release<br>ICS IFN $\gamma$ release<br>multimer/tetramer qualitative binding | [4,5,17,26,43]     |
|            |                  |                    | MHC        | HLA-A*02:01    | purified MHC/competitive/radioactivity half maximal inhibitory concentration (IC50)                                               | [6,25,26,32,36,44] |
|            |                  |                    |            | HLA-A*02:03    | purified MHC/competitive/radioactivity dissociation constant KD (~IC50)                                                           |                    |
|            |                  |                    |            | HLA-A*02:06    | cellular MHC/direct/fluorescence qualitative binding                                                                              |                    |
| 1597686    | FLHVTYVPA        | S (1062-1070)      | T-cell     | HLA-A*02:03    | CFSE proliferation<br>ICS IFN $\gamma$ release                                                                                    | [8,27]             |

| Epitope ID | Epitope sequence | Protein (position) | Assay type | Allele                                                    | Assay                                                                                               | Ref    |
|------------|------------------|--------------------|------------|-----------------------------------------------------------|-----------------------------------------------------------------------------------------------------|--------|
|            |                  |                    |            |                                                           | multimer/tetramer qualitative binding                                                               |        |
| 1074925    | HVTYVPAQEKNF     | S (1064-1075)      | T-cell     | HLA class I                                               | biological activity activation                                                                      | [2]    |
| 1318209    | HVTYVPAQEEK      | S (1064-1073)      | T-cell     | HLA-A*68:01                                               | biological activity activation                                                                      | [5]    |
| 1310928    | VTYVPAQEEK       | S (1065-1073)      | T-cell     | HLA-A*30:01<br>HLA-A*03:01<br>HLA-A*11:01<br>HLA class II | biological activity activation<br>ICS IFN $\gamma$ release                                          | [5,8]  |
|            |                  |                    | MHC        | HLA-A*03:01<br>HLA-A*11:01                                | cellular<br>MHC/competitive/fluorescence<br>qualitative binding<br>purified MHC qualitative binding | [8,45] |
| 1334122    | TYVPAQEKNFT      | S (1066-1076)      | T-cell     | HLA-A*24:02                                               | multimer/tetramer qualitative binding                                                               | [4]    |

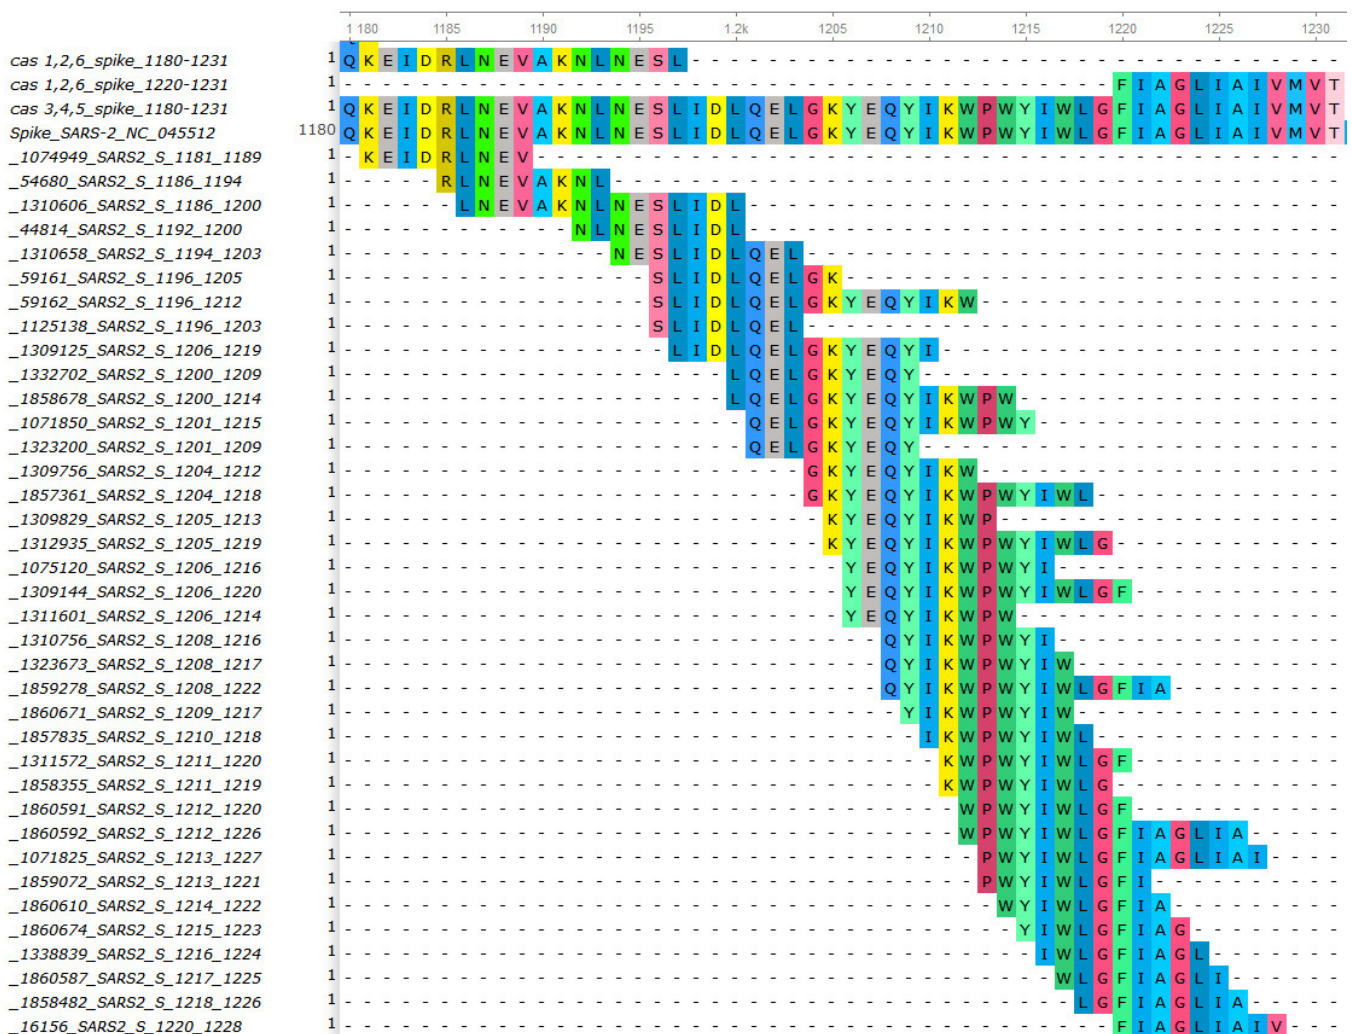

**Figure S4.** 1180-1231 fragment of spike protein aligned with peptides established as immunogenic/MHC molecule binding epitopes in experimental studies. This fragment is a part of cassettes #1-6. Epitopes' IDs in Immune Epitope Database are indicated on the left. References and additional information regarding these epitopes are listed in Table S6.

**Table S6.** Epitopes in 1056-1078 fragment of spike protein, deposited in IEDB, additional information and references

| Epitope ID | Epitope sequence  | Protein (position) | Assay type | Allele                                                                  | Assay                                                                                                                                                 | Ref                 |
|------------|-------------------|--------------------|------------|-------------------------------------------------------------------------|-------------------------------------------------------------------------------------------------------------------------------------------------------|---------------------|
| 1074949    | KEIDRLNEV         | S (1181-1189)      | T-cell     | HLA class I<br>HLA-B*44:03<br>HLA-B*44:02<br>HLA-B*40:01                | biological activity activation                                                                                                                        | [2,5]               |
| 54680      | RLNEVAKNL         | S (1186-1194)      | T-cell     | HLA-A*02:01                                                             | multimer/tetramer qualitative binding<br>ICS IFN $\gamma$ release<br>ELISPOT IFN $\gamma$ release<br>51 chromium cytotoxicity                         | [16,25,28,36,37,46] |
|            |                   |                    | MHC        | HLA-A*02:01                                                             | cellular MHC/direct/fluorescence qualitative binding<br>purified MHC/direct/fluorescence<br>50% dissociation temperature                              | [25,47]             |
| 1310606    | LNEVAKNLNESLIDL   | S (1186-1200)      | T-cell     | HLA class II                                                            | ELISPOT<br>IFN $\gamma$ release                                                                                                                       | [13]                |
| 44814      | NLNESLIDL         | S (1192-1200)      | T-cell     | HLA-A*02:01                                                             | 51 chromium cytotoxicity<br>ELISPOT IFN $\gamma$ release<br>multimer/tetramer qualitative binding<br>High throughput multiplexed assay T cell binding | [2,16,18,28]        |
|            |                   |                    | MHC        | HLA-A*02:01                                                             | cellular MHC/direct/fluorescence qualitative binding<br>cellular MHC/mass spectrometry ligand presentation                                            | [18,23,25,26,48]    |
| 1310658    | NESLIDLQEL        | S (1194-1203)      | T-cell     | HLA-B*40:01                                                             | biological activity activation                                                                                                                        | [5]                 |
| 59161      | SLIDLQELGK        | S (1196-1205)      | T-cell     | HLA-A*11:01<br>HLA class II                                             | ICS IFN $\gamma$ release                                                                                                                              | [8]                 |
|            |                   |                    | MHC        | HLA-A*11:01<br>HLA-A*68:01<br>HLA-A*03:01<br>HLA-A*31:01<br>HLA-A*33:01 | cellular MHC/competitive/fluorescence qualitative binding<br>purified MHC/competitive/radioactivity dissociation constant KD (~IC50)                  | [6,8]               |
| 59162      | SLIDLQELGKYEQYIKW | S (1196-1212)      | T-cell     | HLA class I                                                             | High throughput multiplexed assay T cell binding                                                                                                      | [2]                 |
| 1125138    | SLIDLQEL          | S (1196-1203)      | T-cell     | HLA-A*02:01                                                             | multimer/tetramer qualitative binding                                                                                                                 | [4]                 |
| 1332702    | LQELGKYEQY        | S (1200-1209)      | T-cell     | HLA-A*01:01                                                             | multimer/tetramer qualitative binding                                                                                                                 | [4]                 |
| 1858678    | LQELGKYEQYIKWPW   | S (1200-1214)      | T-cell     | HLA-A*24:02                                                             | ICS IFN $\gamma$ release<br>ICS TNF $\alpha$ release                                                                                                  | [49]                |
| 1071850    | QELGKYEQYIKWPWY   | S (1201-1215)      | T-cell     | HLA class II                                                            | biological activity activation                                                                                                                        | [5]                 |
|            |                   |                    | B-cell     |                                                                         | ELISA qualitative binding                                                                                                                             | [21]                |
| 1323200    | QELGKYEQY         | S (1201-1209)      | T-cell     | HLA-B*44:03<br>HLA-B*44:02                                              | biological activity activation                                                                                                                        | [5]                 |
| 1309756    | GKYEQYIKW         | S (1204-1212)      | T-cell     | HLA-A*24:02                                                             | ICS IFN $\gamma$ release                                                                                                                              | [49]                |
| 1857361    | GKYEQYIKWPWYIWL   | S (1204-1218)      | T-cell     | HLA-A*24:02                                                             | ICS IFN $\gamma$ release                                                                                                                              | [49]                |
| 1309829    | KYEQYIKWP         | S (1205-1213)      | T-cell     | HLA-A*24:02                                                             | ICS IFN $\gamma$ release                                                                                                                              | [49]                |
|            |                   |                    | MHC        | HLA class II                                                            | cellular MHC/mass spectrometry ligand presentation                                                                                                    | [12]                |

| Epitope ID | Epitope sequence     | Protein (position) | Assay type       | Allele                                                                                 | Assay                                                                                                                                                                                                                                                                                                                                                                                                                                      | Ref                                            |
|------------|----------------------|--------------------|------------------|----------------------------------------------------------------------------------------|--------------------------------------------------------------------------------------------------------------------------------------------------------------------------------------------------------------------------------------------------------------------------------------------------------------------------------------------------------------------------------------------------------------------------------------------|------------------------------------------------|
| 1312935    | KYEQYIKWPWYIWL<br>G  | S (1205-1219)      | T-cell           | HLA-A*24:02<br>HLA class I                                                             | multimer/tetramer qualitative binding<br>High throughput multiplexed assay T cell binding                                                                                                                                                                                                                                                                                                                                                  | [2,4]                                          |
| 1075120    | YEQYIKWPWYI          | S (1206-1216)      | T-cell           | HLA-A*24:02<br>HLA class I                                                             | multimer/tetramer qualitative binding<br>High throughput multiplexed assay T cell binding                                                                                                                                                                                                                                                                                                                                                  | [2,4]                                          |
| 1309125    | LIDLQELGKYEQYI       | S (1206-1219)      | T-cell           | nd                                                                                     | ELISPOT IFN $\gamma$ release                                                                                                                                                                                                                                                                                                                                                                                                               | [50]                                           |
| 1309144    | YEQYIKWPWYIWL<br>G F | S (1206-1220)      | T-cell           | HLA class II                                                                           | ELISPOT IFN $\gamma$ release                                                                                                                                                                                                                                                                                                                                                                                                               | [13,50]                                        |
| 1311601    | YEQYIKWPW            | S (1206-1214)      | T-cell           | HLA-A*24:02<br>HLA-B*44:02<br>HLA-B*44:03                                              | biological activity activation<br>ICS IFN $\gamma$ release<br>ICS TNF $\alpha$ release                                                                                                                                                                                                                                                                                                                                                     | [5,49,51]                                      |
| 1310756    | QYIKWPWYI            | S (1208-1216)      | T-cell           | HLA-A*24:02                                                                            | biological activity activation<br>ELISA IFN $\gamma$ release<br>ELISPOT IFN $\gamma$ release<br>ICS IFN $\gamma$ release<br>ICS TNF $\alpha$ release<br>multimer/tetramer qualitative binding                                                                                                                                                                                                                                              | [4,5,17,33,43,46,49,52-57]                     |
| 1323673    | QYIKWPWYIW           | S (1208-1217)      | T-cell           | HLA-A*23:01                                                                            | biological activity activation                                                                                                                                                                                                                                                                                                                                                                                                             | [5]                                            |
| 1859278    | QYIKWPWYIWL<br>GFI A | S (1208-1222)      | T-cell           | HLA-A*24:02                                                                            | ICS IFN $\gamma$ , TNF $\alpha$ release                                                                                                                                                                                                                                                                                                                                                                                                    | [49]                                           |
| 1860671    | YIKWPWYIW            | S (1209-1217)      | T-cell           | HLA-A*24:02                                                                            | ICS IFN $\gamma$ , TNF $\alpha$ release                                                                                                                                                                                                                                                                                                                                                                                                    | [49]                                           |
| 1857835    | IKWPWYIWL            | S (1210-1218)      | T-cell           | HLA-A*24:02                                                                            | ICS IFN $\gamma$ , TNF $\alpha$ release                                                                                                                                                                                                                                                                                                                                                                                                    | [49]                                           |
| 1311572    | KWPWYIWL<br>GFI      | S (1211-1220)      | T-cell           | HLA-A*24:02                                                                            | ICS IFN $\gamma$ , TNF $\alpha$ release                                                                                                                                                                                                                                                                                                                                                                                                    | [17,51]                                        |
| 1858355    | KWPWYIWL<br>GFI      | S (1211-1219)      | T-cell           | HLA-A*24:02                                                                            | ICS IFN $\gamma$ , TNF $\alpha$ release                                                                                                                                                                                                                                                                                                                                                                                                    | [49]                                           |
| 1860591    | WPWYIWL<br>GFI       | S (1212-1220)      | T-cell           | HLA-A*24:02                                                                            | ICS IFN $\gamma$ , TNF $\alpha$ release                                                                                                                                                                                                                                                                                                                                                                                                    | [49]                                           |
| 1860592    | WPWYIWL<br>GFIAGLI A | S (1212-1226)      | T-cell           | HLA-A*24:02                                                                            | ICS IFN $\gamma$ , TNF $\alpha$ release                                                                                                                                                                                                                                                                                                                                                                                                    | [49]                                           |
| 1071825    | PWYIWL<br>GFIAGLIAI  | S (1213-1227)      | T-cell<br>B-cell | nd                                                                                     | ELISPOT IFN $\gamma$ release<br>ELISA qualitative binding                                                                                                                                                                                                                                                                                                                                                                                  | [58]<br>[21]                                   |
| 1859072    | PWYIWL<br>GFI        | S (1213-1221)      | T-cell           | HLA-A*24:02                                                                            | ICS IFN $\gamma$ , TNF $\alpha$ release                                                                                                                                                                                                                                                                                                                                                                                                    | [49]                                           |
| 1860610    | WYIWL<br>GFI         | S (1214-1222)      | T-cell           | HLA-A*24:02                                                                            | ICS IFN $\gamma$ , TNF $\alpha$ release                                                                                                                                                                                                                                                                                                                                                                                                    | [49]                                           |
| 1860674    | YIWL<br>GFIAG        | S (1215-1223)      | T-cell           | HLA-A*24:02                                                                            | ICS IFN $\gamma$ , TNF $\alpha$ release                                                                                                                                                                                                                                                                                                                                                                                                    | [49]                                           |
| 1338839    | IWL<br>GFIAGL        | S (1216-1224)      | T-cell           | HLA-A*24:02                                                                            | ICS IFN $\gamma$ , TNF $\alpha$ release                                                                                                                                                                                                                                                                                                                                                                                                    | [49]                                           |
| 1860587    | WL<br>GFIAGLI        | S (1217-1225)      | T-cell           | HLA-A*24:02                                                                            | ICS IFN $\gamma$ , TNF $\alpha$ release                                                                                                                                                                                                                                                                                                                                                                                                    | [49]                                           |
| 1858482    | LGFIAGLIA            | S (1218-1226)      | T-cell           | HLA-A*24:02                                                                            | ICS IFN $\gamma$ , TNF $\alpha$ release                                                                                                                                                                                                                                                                                                                                                                                                    | [49]                                           |
| 16156      | FIAGLIAIV            | S (1220-1228)      | T-cell<br>MHC    | HLA-A*02:01<br>HLA-A*02:01<br>HLA-A*02:02<br>HLA-A*02:03<br>HLA-A*02:06<br>HLA-A*68:02 | biological activity activation<br>in vivo assay cytotoxicity<br>biological activity degranulation<br>ELISA IFN $\gamma$ release<br>ELISPOT IFN $\gamma$ release<br>High throughput multiplexed assay T cell binding<br>ICS IFN $\gamma$ , TNF $\alpha$ release<br>multimer/tetramer qualitative binding<br>purified MHC/competitive/radioactivity dissociation constant KD (~IC50)<br>cellular MHC/direct/fluorescence qualitative binding | [2,4,8,15,16,28,38,41,59-62]<br>[6,8,15,32,38] |



| Epitope ID | Epitope sequence | Protein (position) | Assay type | Allele | Assay                                                                               | Ref |
|------------|------------------|--------------------|------------|--------|-------------------------------------------------------------------------------------|-----|
|            |                  |                    |            |        | purified MHC/competitive/radioactivity half maximal inhibitory concentration (IC50) |     |

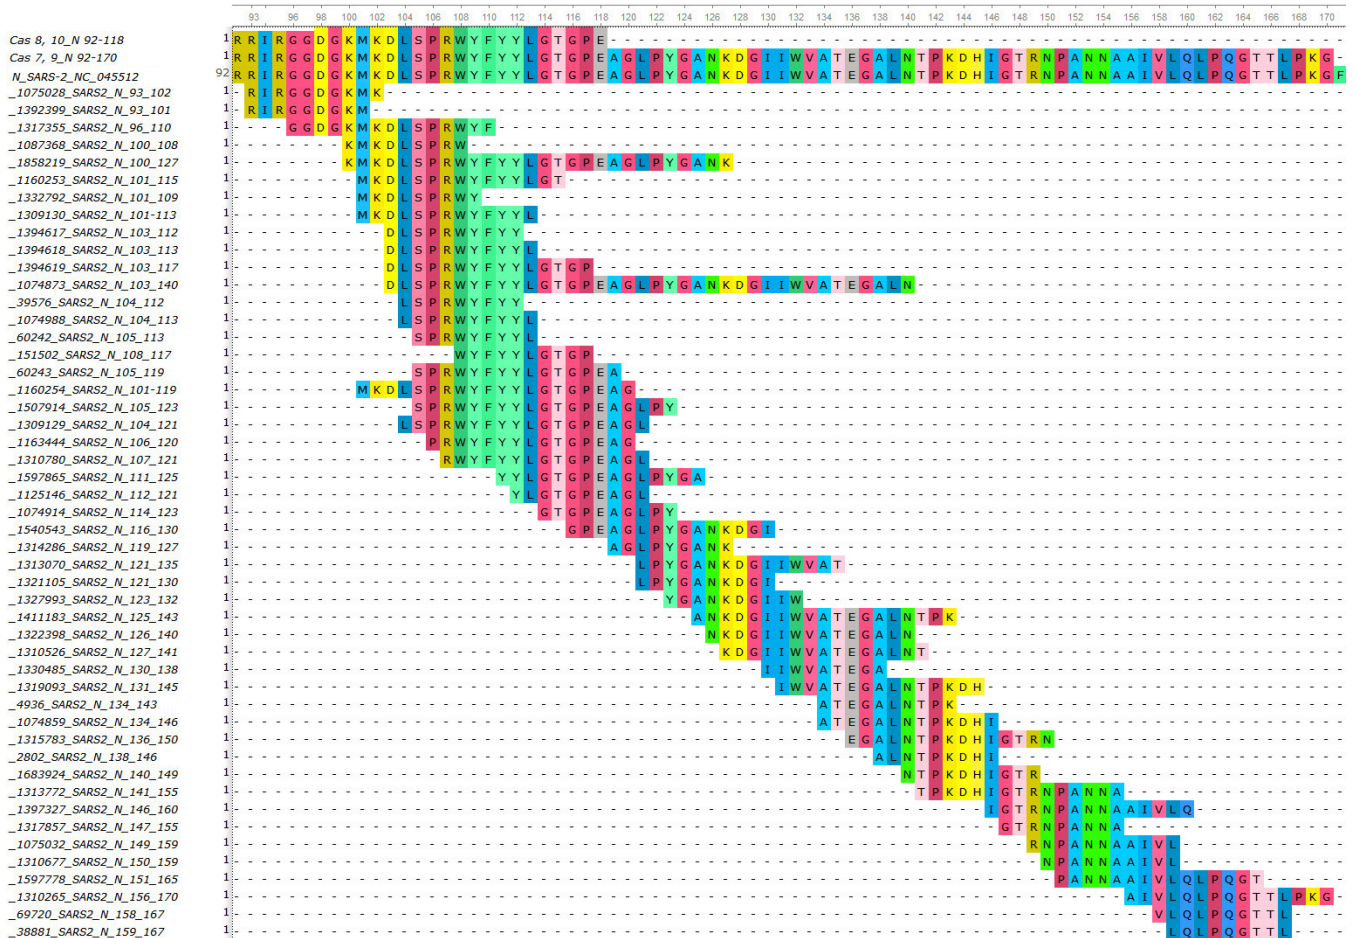

**Figure S5.** 92-170 fragments of nucleocapsid protein aligned with peptides established as immunogenic/MHC molecule binding epitopes in experimental studies. This fragment is a part of cassette #7-10. Epitopes' IDs in Immune Epitope Database are indicated on the left. References and additional information regarding these epitopes are listed in Table S7. This fragment is a part of a fragment of RNA-binding domain [64].

**Table S7.** Epitopes in 92-170 fragment of nucleocapsid protein, deposited in IEDB, additional information and references

| Epitope ID | Epitope sequence | Protein (position) | Assay type | Allele                     | Assay                                                      | Ref     |
|------------|------------------|--------------------|------------|----------------------------|------------------------------------------------------------|---------|
| 1325864    | TRRIRGGDGKMKDLS  | N (91-105)         | T-cell     | HLA class II               | biological activity activation<br>ICS IFN $\gamma$ release | [5,65]  |
| 1075028    | RIRGGDGKMK       | N (93-102)         | T-cell     | HLA class I                | High throughput multiplexed<br>assay T cell binding        | [2]     |
| 1392399    | RIRGGDGKM        | N (93-101)         | T-cell     | HLA-B*07:02                | biological activity activation<br>ICS IFN $\gamma$ release | [66–68] |
| 1317355    | GGDGKMKDLSPRWYF  | N (96-110)         | T-cell     | HLA class II               | biological activity activation<br>ICS IFN $\gamma$ release | [5,65]  |
|            |                  |                    | B-cell     |                            | ELISA qualitative binding                                  | [21]    |
| 1087368    | KMKDLSPRW        | N (100-108)        | T-cell     | HLA-B*57:01<br>HLA class I | biological activity activation                             | [2,5]   |

|         |                                        |             |        |                                                                                                                                                                             |                                                                                                                                                                                                                                                                                       |                                           |
|---------|----------------------------------------|-------------|--------|-----------------------------------------------------------------------------------------------------------------------------------------------------------------------------|---------------------------------------------------------------------------------------------------------------------------------------------------------------------------------------------------------------------------------------------------------------------------------------|-------------------------------------------|
|         |                                        |             |        |                                                                                                                                                                             | High throughput multiplexed assay T cell binding                                                                                                                                                                                                                                      |                                           |
| 1858219 | KMKDLSPRWYFYLLGTGPEAGLPYGANK           | N (100-127) | T-cell | HLA class I, II                                                                                                                                                             | biological activity activation                                                                                                                                                                                                                                                        | [69]                                      |
| 1160253 | MKDLSPRWYFYLLGT                        | N (101-115) | T-cell | HLA class II                                                                                                                                                                | biological activity activation<br>ELISPOT IFN $\gamma$ release<br>ICS IFN $\gamma$ release                                                                                                                                                                                            | [5,65,70]                                 |
| 1332792 | MKDLSPRWY                              | N (101-109) | T-cell | HLA-C*07:01                                                                                                                                                                 | multimer/tetramer qualitative binding                                                                                                                                                                                                                                                 | [4]                                       |
| 1074873 | DLSPRWYFYLLGTGPEAGLPYGANKDGIHVVATEGALN | N (103-140) | T-cell | HLA class I                                                                                                                                                                 | High throughput multiplexed assay T cell binding                                                                                                                                                                                                                                      | [2]                                       |
| 1394617 | DLSPRWYFYLL                            | N (103-112) | T-cell | HLA-A2<br>HLA-A29                                                                                                                                                           | ELISPOT IFN $\gamma$ release                                                                                                                                                                                                                                                          | [71]                                      |
| 1394618 | DLSPRWYFYLL                            | N (103-113) | T-cell | HLA-A2<br>HLA-A29                                                                                                                                                           | ELISPOT IFN $\gamma$ release                                                                                                                                                                                                                                                          | [71]                                      |
| 1394619 | DLSPRWYFYLLGTGP                        | N (103-117) | T-cell | HLA-A2<br>HLA-A29<br>HLA class I, II                                                                                                                                        | ELISPOT IFN $\gamma$ release<br>biological activity degranulation<br>ICS IFN $\gamma$ release                                                                                                                                                                                         | [71]                                      |
| 1074988 | LSPRWYFYLL                             | N (104-113) | T-cell | HLA-A*24:02<br>HLA class I                                                                                                                                                  | ICS IFN $\gamma$ release<br>High throughput multiplexed assay T cell binding                                                                                                                                                                                                          | [2,8]                                     |
| 1309129 | LSPRWYFYLLGTGPEAGL                     | N (104-121) | T-cell | HLA-B*07:02<br>HLA-C*07:02<br>HLA-A*02:01                                                                                                                                   | ELISPOT IFN $\gamma$ release                                                                                                                                                                                                                                                          | [50]                                      |
| 60242   | SPRWYFYLL                              | N (105-113) | T-cell | HLA-B*07:02<br>HLA-B*08:01<br>HLA-B35<br>HLA-A*02:01                                                                                                                        | biological activity activation<br>biological activity degranulation<br>ELISA IFN $\gamma$ release<br>ELISPOT IFN $\gamma$ release<br>ICS CCL4/MIP-1b release<br>ICS IFN $\gamma$ , IL-2, TNF $\alpha$ release<br>in vitro assay cytotoxicity<br>multimer/tetramer qualitative binding | [4,5,17,43,48,50,50,51,53,56,66–68,71,72] |
|         |                                        |             | MHC    | HLA-B*07:02<br>HLA-B*54:01<br>HLA-B*51:01<br>HLA-B*53:01                                                                                                                    | purified MHC/competitive/radioactivity dissociation constant KD (~IC50)<br>purified MHC/direct/fluorescence 50% dissociation temperature                                                                                                                                              | [6,66]                                    |
| 60243   | SPRWYFYLLGTGPEA                        | N (105-119) | T-cell | HLA class II                                                                                                                                                                | ELISA IFN $\gamma$ release                                                                                                                                                                                                                                                            | [11]                                      |
| 1507914 | SPRWYFYLLGTGPEAGLPY                    | N (105-123) | T-cell | HLA class II                                                                                                                                                                | ELISA IFN $\gamma$ release                                                                                                                                                                                                                                                            | [11]                                      |
| 1163444 | PRWYFYLLGTGPEAG                        | N (106-120) | T-cell | HLA class II<br>HLA-DQB1*05:03<br>HLA-DQB1*02:01<br>HLA-DQA1*05:01/DQB1*02:01<br>HLA-DQA1*05:01/DQB1*02:01<br>HLA-DQA1*05:01/DQB1*02:01<br>HLA-DRB1*01:01<br>HLA-DRB1*08:02 | ICS IFN $\gamma$ release<br>biological activity activation<br>ELISPOT IFN $\gamma$ release                                                                                                                                                                                            | [5,65,70]                                 |



|         |                     |             |        |                                                                                                                                                                                                                                                                                                                                                                                                            |                                                                                                                 |                |
|---------|---------------------|-------------|--------|------------------------------------------------------------------------------------------------------------------------------------------------------------------------------------------------------------------------------------------------------------------------------------------------------------------------------------------------------------------------------------------------------------|-----------------------------------------------------------------------------------------------------------------|----------------|
|         |                     |             |        | HLA-DRB1*11:01<br>HLA-DRB3*01:01<br>HLA-DRB3*02:02<br>HLA-DRB1*04:01<br>HLA-DRB1*04:05<br>HLA-DRB1*12:01<br>HLA-<br>DQA1*03:01/DQB1*03:0<br>2<br>HLA-DRB1*07:01<br>HLA-DRB1*15:01<br>HLA-DRB5*01:01<br>HLA-DQB1*05:01<br>HLA-DPB1*02:01<br>HLA-<br>DQA1*01:01/DQB1*05:0<br>1<br>HLA-DRB1*09:01                                                                                                             |                                                                                                                 |                |
| 1310780 | RWYFYLLGTGPEAG<br>L | N (107-121) | T-cell | HLA-DR                                                                                                                                                                                                                                                                                                                                                                                                     | biological activity activation<br>ELISPOT IFN $\gamma$ release<br>ICS IFN $\gamma$ , IL-2, TNF $\alpha$ release | [52,57,<br>73] |
| 151502  | WYFYLLGTGP          | N (108-117) | T-cell | nd                                                                                                                                                                                                                                                                                                                                                                                                         | ELISPOT IFN $\gamma$ release                                                                                    | [71]           |
| 1597865 | YYLGTGPEAGLPYG<br>A | N (111-125) | T-cell | HLA class II                                                                                                                                                                                                                                                                                                                                                                                               | ICS IFN $\gamma$ release                                                                                        | [65]           |
| 1125146 | YLGTGPEAGL          | N (112-121) | T-cell | HLA-A*02:01                                                                                                                                                                                                                                                                                                                                                                                                | biological activity activation<br>ICS IFN $\gamma$ release<br>multimer/tetramer qualitative<br>binding          | [23,41]        |
| 1074914 | GTGPEAGLPY          | N (114-135) | T-cell | HLA class I                                                                                                                                                                                                                                                                                                                                                                                                | High throughput multiplexed<br>assay T cell binding                                                             | [2]            |
| 1540543 | GPEAGLPYGANKDG<br>I | N (116-130) | T-cell | HLA class II                                                                                                                                                                                                                                                                                                                                                                                               | ICS IFN $\gamma$ release                                                                                        | [65]           |
| 1314286 | AGLPYGANK           | N (119-127) | T-cell | HLA-A*30:01                                                                                                                                                                                                                                                                                                                                                                                                | biological activity activation                                                                                  | [5]            |
| 1313070 | LPYGANKDGIWVA<br>T  | N (121-135) | T-cell | HLA class II<br>HLA-<br>DQA1*05:01/DQB1*02:0<br>1<br>HLA-<br>DQA1*05:01/DQB1*03:0<br>1<br>HLA-DRB1*01:01<br>HLA-DRB4*01:01<br>HLA-DRB1*08:02<br>HLA-DRB1*11:01<br>HLA-DRB3*01:01<br>HLA-DRB3*02:02<br>HLA-DRB1*04:01<br>HLA-DRB1*04:05<br>HLA-DRB1*12:01<br>HLA-DRB1*09:01<br>HLA-<br>DQA1*01:02/DQB1*06:0<br>2<br>HLA-<br>DQA1*03:01/DQB1*03:0<br>2<br>HLA-DRB1*07:01<br>HLA-DRB1*15:01<br>HLA-DRB5*01:01 | ICS IFN $\gamma$ release<br>biological activity activation<br>ELISPOT IFN $\gamma$ release                      | [5,65,7<br>0]  |

|         |                        |             |        |                                                                                                                                                                                                                                                                                                                                                                                                                                                                                                     |                                                                                                                                                         |                 |
|---------|------------------------|-------------|--------|-----------------------------------------------------------------------------------------------------------------------------------------------------------------------------------------------------------------------------------------------------------------------------------------------------------------------------------------------------------------------------------------------------------------------------------------------------------------------------------------------------|---------------------------------------------------------------------------------------------------------------------------------------------------------|-----------------|
|         |                        |             |        | HLA-DPA1*01:03/DPB1*04:01                                                                                                                                                                                                                                                                                                                                                                                                                                                                           |                                                                                                                                                         |                 |
| 1321105 | LPYGANKDGI             | N (121-130) | T-cell | HLA-B*51:01                                                                                                                                                                                                                                                                                                                                                                                                                                                                                         | biological activity activation                                                                                                                          | [5]             |
| 1327993 | YGANKDGIW              | N (123-132) | T-cell | HLA-B*57:01                                                                                                                                                                                                                                                                                                                                                                                                                                                                                         | biological activity activation                                                                                                                          | [5]             |
| 1411183 | ANKDGIWVATEGA<br>LNTPK | N (125-140) | T-cell | HLA class II                                                                                                                                                                                                                                                                                                                                                                                                                                                                                        | ELISA IFN $\gamma$ release                                                                                                                              | [11]            |
| 1322398 | NKDGIWVATEGAL<br>N     | N (126-140) | T-cell | HLA-DRB1*01:01<br>HLA-DRB1*03:01<br>HLA-DRB1*04:01<br>HLA-DRB1*04:04<br>HLA-DRB1*04:05<br>HLA-DRB1*07:01<br>HLA-DRB1*08:02<br>HLA-DRB1*09:01<br>HLA-DRB1*11:01<br>HLA-DRB1*15:01<br>HLA-DRB3*01:01<br>HLA-DRB3*02:02<br>HLA-DRB4*01:01<br>HLA-DRB5*01:01<br>HLA-DQB1*02:01<br>HLA-DQB1*02:02<br>HLA-DQB1*03:02<br>HLA-DQB1*05:03<br>HLA-DPB1*02:01<br>HLA-DQA1*05:01/DQB1*02:01<br>HLA-DQA1*05:01/DQB1*03:01<br>HLA-DQA1*03:01/DQB1*03:02<br>HLA-DQA1*01:02/DQB1*06:02<br>HLA-DPA1*01:03/DPB1*04:01 | ICS IFN $\gamma$ release<br>biological activity activation<br>ELISPOT IFN $\gamma$ release                                                              | [5,65]          |
|         |                        |             | B-cell |                                                                                                                                                                                                                                                                                                                                                                                                                                                                                                     | ELISA qualitative binding                                                                                                                               |                 |
| 1310526 | KDGIWVATEGALN<br>T     | N (127-141) | T-cell | HLA-DR                                                                                                                                                                                                                                                                                                                                                                                                                                                                                              | biological activity activation<br>ELISPOT IFN $\gamma$ release<br>ICS IFN $\gamma$ , TNF $\alpha$ release                                               | [52,57]         |
| 1330485 | IWVATEGA               | N (130-138) | T-cell | HLA-A*02:01                                                                                                                                                                                                                                                                                                                                                                                                                                                                                         | biological activity degranulation<br>ICS IFN $\gamma$ , IL-2, TNF $\alpha$ release                                                                      | [74]            |
| 1319093 | IWVATEGALNTPKD<br>H    | N (131-145) | T-cell | HLA class II                                                                                                                                                                                                                                                                                                                                                                                                                                                                                        | biological activity activation<br>ICS IFN $\gamma$ release                                                                                              | [5,65]          |
| 4936    | ATEGALNTPK             | N (134-143) | T-cell | HLA-A*11:01                                                                                                                                                                                                                                                                                                                                                                                                                                                                                         | biological activity activation<br>ELISA IFN $\gamma$ release<br>ELISPOT IFN $\gamma$ release<br>ICS IFN $\gamma$ release<br>in vitro assay cytotoxicity | [5,17,53,57,68] |
|         |                        |             | MHC    | HLA-A*11:01<br>HLA-A*68:01<br>HLA-A*03:01<br>HLA-A*31:01                                                                                                                                                                                                                                                                                                                                                                                                                                            | cellular MHC/mass spectrometry ligand presentation<br>purified MHC/competitive/radioactivity dissociation constant KD (~IC50)                           |                 |

|         |                      |             |        |              |                                                                                                                                   |                |
|---------|----------------------|-------------|--------|--------------|-----------------------------------------------------------------------------------------------------------------------------------|----------------|
| 1074859 | ATEGALNTPKDH         | N (134-146) | T-cell | HLA class I  | High throughput multiplexed assay T cell binding                                                                                  | [2]            |
| 1315783 | EGALNTPKDHIGTR<br>N  | N (136-150) | T-cell | HLA class II | biological activity activation<br>ICS IFN $\gamma$ release                                                                        | [5,65]         |
|         |                      |             | B-cell |              | ELISA qualitative binding                                                                                                         | [21]           |
| 2802    | ALNTPKDH             | N (138-146) | T-cell | HLA-A*02:01  | ELISPOT IFN $\gamma$ release<br>ICS IFN $\gamma$ release                                                                          | [76–78]        |
|         |                      |             | MHC    |              | cellular<br>MHC/direct/fluorescence<br>qualitative binding<br>purified<br>MHC/direct/fluorescence 50%<br>dissociation temperature | [26,77,<br>78] |
| 1683924 | NTPKDHIGTR           | N (140-149) | T-cell | HLA-A*33:03  | ICS IFN $\gamma$ release                                                                                                          | [8]            |
| 1313772 | TPKDHIGTRNPANNA      | N (141-155) | T-cell | HLA class II | ICS IFN $\gamma$ release                                                                                                          | [65]           |
| 1397327 | IGTRNPANNAIVL<br>Q   | N (143-160) | T-cell | nd           | ELISPOT IFN $\gamma$ release                                                                                                      | [65]           |
|         |                      |             | B-cell |              | Microarray qualitative binding                                                                                                    | [79]           |
| 1317857 | GTRNPANNA            | N (147-155) | T-cell | HLA-A*30:01  | biological activity activation                                                                                                    | [5]            |
| 1075032 | RNPANNAIVL           | N (149-159) | T-cell | HLA class I  | High throughput multiplexed assay T cell binding                                                                                  | [2]            |
| 1310677 | NPANNAIVL            | N (150-159) | T-cell | HLA-B*07:02  | biological activity activation<br>ICS IFN $\gamma$ release                                                                        | [5,65]         |
| 1597778 | PANNAIVLQLPQGT       | N (151-165) | T-cell | HLA class II | ICS IFN $\gamma$ release                                                                                                          | [65]           |
| 1310265 | AIVLQLPQGTTLPKG      | N (156-170) | T-cell | HLA-DR       | ELISPOT IFN $\gamma$ release                                                                                                      | [52,57,<br>65] |
|         |                      |             | B-cell |              | biological activity agglutination<br>ELISA qualitative binding<br>Microarray qualitative binding                                  | [21,79,<br>80] |
| 69720   | VLQLPQGTTL           | N (158-167) | T-cell | HLA-A*02:01  | multimer/tetramer qualitative binding                                                                                             | [4]            |
| 1075095 | VLQLPQGTTLPKGFY<br>A | N (158-173) | T-cell | HLA class I  | High throughput multiplexed assay T cell binding                                                                                  | [2]            |
|         |                      |             | B-cell |              | Microarray qualitative binding                                                                                                    | [81]           |
| 38881   | LQLPQGTTL            | N (159-167) | T-cell | HLA-A*02:01  | ELISPOT IFN $\gamma$ release<br>ICS IFN $\gamma$ , TNF $\alpha$ release                                                           | [76–78]        |
|         |                      |             | MHC    |              | cellular<br>MHC/direct/fluorescence<br>qualitative binding<br>purified<br>MHC/direct/fluorescence 50%<br>dissociation temperature | [76,78]        |

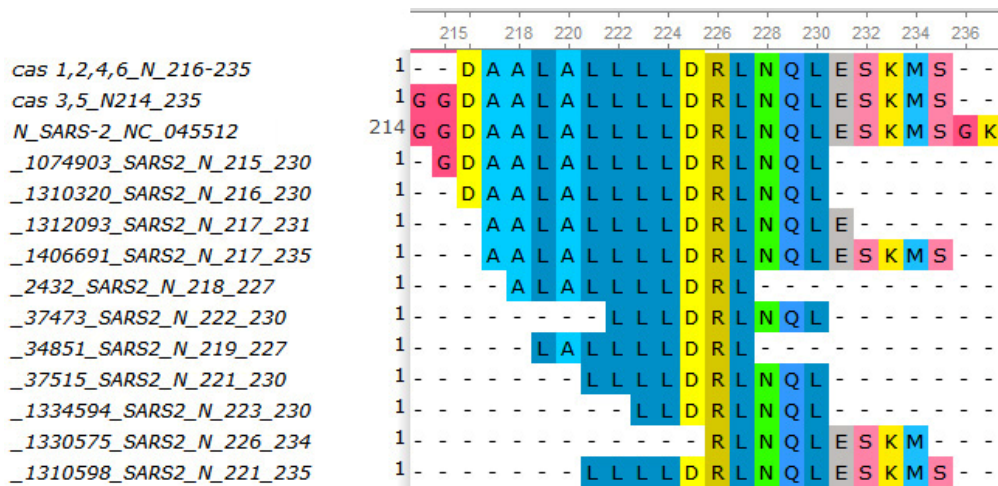

**Figure S6.** 214-235 fragment of nucleocapsid protein aligned with peptides established as immunogenic/MHC molecule binding epitopes in experimental studies. This fragment is a part of cassettes #1-6. Epitopes' IDs in Immune Epitope Database are indicated on the left. References and additional information regarding these epitopes are listed in Table S8. This fragment is part of the linker connecting two domains, right after the SR-rich region [82].

**Table S8.** Epitopes in 214-235 fragment of nucleocapsid protein, deposited in IEDB, additional information and references

| Epitope ID | Epitope sequence | Protein (position) | Assay type | Allele                                                                                                                                                                                                                                                                                                                                                                                                                                                                                            | Assay                                                                                                              | Ref       |
|------------|------------------|--------------------|------------|---------------------------------------------------------------------------------------------------------------------------------------------------------------------------------------------------------------------------------------------------------------------------------------------------------------------------------------------------------------------------------------------------------------------------------------------------------------------------------------------------|--------------------------------------------------------------------------------------------------------------------|-----------|
| 1074903    | GDAALALLLLDRLNQL | N (215-230)        | T-cell     | HLA class I                                                                                                                                                                                                                                                                                                                                                                                                                                                                                       | High throughput multiplexed assay<br>T cell binding                                                                | [2]       |
|            |                  |                    | B-cell     |                                                                                                                                                                                                                                                                                                                                                                                                                                                                                                   | Microarray qualitative binding                                                                                     | [81]      |
| 1310320    | DAALALLLLDRLNQL  | N (216-230)        | T-cell     | HLA-DQB1*05:03<br>HLA class II<br>HLA-DRB1*15:01<br>HLA-DRB1*12:01<br>HLA-DQB1*06:02<br>HLA-DRB1*03:01<br>HLA-DRB1*14:01<br>HLA-DPA1*01:03/DPB1*04:01<br>HLA-DQA1*05:01/DQB1*03:01<br>HLA-DQA1*03:01/DQB1*03:02<br>HLA-DQA1*01:01/DQB1*05:01<br>HLA-DQA1*01:02/DQB1*06:02<br>HLA-DRB1*04:05<br>HLA-DRB1*08:02<br>HLA-DRB1*09:01<br>HLA-DRB1*13:02<br>HLA-DQB1*05:03<br>HLA-DRB1*11:01<br>HLA-DRB5*01:01<br>HLA-DRB1*03:01<br>HLA-DRB1*04:01<br>HLA-DRB3*01:01<br>HLA-DRB4*01:01<br>HLA-DRB1*14:01 | biological activity activation<br>ELISPOT IFN $\gamma$ release<br>ELISPOT IL-5 release<br>ICS IFN $\gamma$ release | [5,13,65] |

| Epitope ID | Epitope sequence    | Protein (position) | Assay type | Allele                                                                                                                                                                                                                                                                                                                                                                                                                                                                                                                                                                                                                                       | Assay                                                                                                                | Ref                      |
|------------|---------------------|--------------------|------------|----------------------------------------------------------------------------------------------------------------------------------------------------------------------------------------------------------------------------------------------------------------------------------------------------------------------------------------------------------------------------------------------------------------------------------------------------------------------------------------------------------------------------------------------------------------------------------------------------------------------------------------------|----------------------------------------------------------------------------------------------------------------------|--------------------------|
|            |                     |                    |            | HLA-DRB1*01:01<br>HLA-DQA1*05:01/DQB1*02:01<br>HLA-DPB1*02:01                                                                                                                                                                                                                                                                                                                                                                                                                                                                                                                                                                                |                                                                                                                      |                          |
|            |                     |                    | MHC        | HLA-DRB1*11:01<br>HLA-DRB3*01:01<br>HLA-DRB1*13:02<br>HLA-DRB3*01:01<br>HLA-DRB4*01:01<br>HLA-DRB1*15:01<br>HLA-DRB1*04:05<br>HLA-DRB4*01:01<br>HLA-DRB1*12:01<br>HLA-DQA1*03:01/DQB1*03:02<br>HLA-DRB1*15:01<br>HLA-DRB1*08:02<br>HLA-DRB1*04:05<br>HLA-DRB1*08:02<br>HLA-DPB1*02:01<br>HLA-DRB1*01:01<br>HLA-DQA1*01:02/DQB1*06:02<br>HLA-DQA1*05:01/DQB1*02:01<br>HLA-DRB1*03:01<br>HLA-DRB1*12:01<br>HLA-DRB1*13:02<br>HLA-DPA1*01:03/DPB1*04:01<br>HLA-DRB1*04:01<br>HLA-DQA1*01:01/DQB1*05:01<br>HLA-DRB1*09:01<br>HLA-DRB5*01:01<br>HLA-DRB1*09:01<br>HLA-DRB5*01:01<br>HLA-DQA1*05:01/DQB1*03:01<br>HLA-DRB1*03:01<br>HLA-DRB1*07:01 | purified MHC/competitive/radioactivity<br>half maximal inhibitory concentration (IC50)                               | [5,65]                   |
| 1312093    | AALALLLDRLNQL E     | N (217-231)        | T-cell     | HLA-DRB1*11:01<br>HLA class II                                                                                                                                                                                                                                                                                                                                                                                                                                                                                                                                                                                                               | biological activity activation<br>cytometric bead array IL-10, IL-13, IL-4, IL-5, TNFα release<br>ELISA IFNγ release | [11,67]                  |
|            |                     |                    | B-cell     |                                                                                                                                                                                                                                                                                                                                                                                                                                                                                                                                                                                                                                              | Microarray qualitative binding                                                                                       | [34,84]                  |
| 1406691    | AALALLLDRLNQL ESKMS | N (217-235)        | T-cell     | HLA class II                                                                                                                                                                                                                                                                                                                                                                                                                                                                                                                                                                                                                                 | ELISA IFNγ release                                                                                                   | [11]                     |
| 2432       | ALALLLDRL           | N (218-227)        | T-cell     | HLA-A2                                                                                                                                                                                                                                                                                                                                                                                                                                                                                                                                                                                                                                       | ELISPOT IFNγ release                                                                                                 | [85]                     |
| 34851      | LALLLDRL            | N (219-227)        | T-cell     | HLA-A*02:01<br>HLA-A*02:06<br>HLA class II                                                                                                                                                                                                                                                                                                                                                                                                                                                                                                                                                                                                   | ELISPOT IFNγ release<br>ICS IFNγ, TNFα release<br>in vitro assay cytotoxicity                                        | [8,30,51,56,62,76-78,86] |

| Epitope ID | Epitope sequence    | Protein (position) | Assay type | Allele                                                                                                                                                                                                                                                                                                                                                                                                                                                                                                      | Assay                                                                                                                                                                                                                                     | Ref                                       |
|------------|---------------------|--------------------|------------|-------------------------------------------------------------------------------------------------------------------------------------------------------------------------------------------------------------------------------------------------------------------------------------------------------------------------------------------------------------------------------------------------------------------------------------------------------------------------------------------------------------|-------------------------------------------------------------------------------------------------------------------------------------------------------------------------------------------------------------------------------------------|-------------------------------------------|
|            |                     |                    | MHC        | HLA-A*02:01                                                                                                                                                                                                                                                                                                                                                                                                                                                                                                 | cellular MHC/direct/fluorescence qualitative binding<br>purified MHC/direct/fluorescence 50% dissociation temperature                                                                                                                     | [76–78]                                   |
| 37515      | LLLLDRLNQL          | N (221-230)        | T-cell     | HLA-A*02:01                                                                                                                                                                                                                                                                                                                                                                                                                                                                                                 | ELISPOT IFN $\gamma$ release<br>ICS IFN $\gamma$ , TNF $\alpha$ release<br>multimer/tetramer qualitative binding                                                                                                                          | [4,57,87,88]                              |
|            |                     |                    | MHC        | HLA-A*02:01                                                                                                                                                                                                                                                                                                                                                                                                                                                                                                 | cellular MHC/direct/fluorescence qualitative binding<br>purified MHC/direct/fluorescence qualitative binding                                                                                                                              | [36,83]                                   |
| 1310598    | LLLLDRLNQLESKM<br>S | N (221-235)        | T-cell     | HLA class II<br>HLA-DR<br>HLA-DRB1*14:01<br>HLA-DRB1*15:01<br>HLA-DRB1*03:01<br>HLA-DRB1*12:01<br>HLA-DQA1*03:01/DQB1*03:02<br>HLA-DQA1*01:01/DQB1*05:01<br>HLA-DQA1*01:02/DQB1*06:02<br>HLA-DRB1*07:01<br>HLA-DRB1*08:02<br>HLA-DRB1*11:01<br>HLA-DRB1*13:02<br>HLA-DRB4*01:01<br>HLA-DRB1*11:01<br>HLA-DRB1*01:01<br>HLA-DPA1*01:03/DPB1*04:01<br>HLA-DRB1*09:01<br>HLA-DRB3*01:01<br>HLA-DQA1*05:01/DQB1*02:01<br>HLA-DRB1*04:05<br>HLA-DRB1*04:01<br>HLA-DRB5*01:01<br>HLA-DPB1*02:01<br>HLA-DRB1*12:01 | biological activity activation<br>ELISPOT IFN $\gamma$ release<br>ICS IFN $\gamma$ , TNF $\alpha$ release                                                                                                                                 | [5,13,52,57,65,73,88]                     |
| 1858532    | LLLLDRLNQLESKM<br>F | N (221-235)        | T-cell     | HLA-DR                                                                                                                                                                                                                                                                                                                                                                                                                                                                                                      | ELISPOT IFN $\gamma$ release                                                                                                                                                                                                              | [88]                                      |
| 37473      | LLLDRLNQL           | N (222-230)        | T-cell     | HLA-A*02:01                                                                                                                                                                                                                                                                                                                                                                                                                                                                                                 | 51 chromium cytotoxicity<br>biological activity activation<br>CFSE proliferation<br>ELISA IFN $\gamma$ release<br>ICS IFN $\gamma$ , TNF $\alpha$ release<br>in vitro assay cytotoxicity<br>in vivo assay pathogen burden after challenge | [5,8,23,26,30,41,43,51,53,55,56,62,72,76– |

| Epitope ID | Epitope sequence | Protein (position) | Assay type | Allele                     | Assay                                                                                                                                                                              | Ref                       |
|------------|------------------|--------------------|------------|----------------------------|------------------------------------------------------------------------------------------------------------------------------------------------------------------------------------|---------------------------|
|            |                  |                    |            |                            | multimer/tetramer qualitative binding                                                                                                                                              | 78,83,88]                 |
|            |                  |                    | MHC        | HLA-A*02:01<br>HLA-A*02:03 | cellular MHC/competitive/fluorescence qualitative binding<br>cellular MHC/direct/fluorescence qualitative binding<br>purified MHC/direct/fluorescence 50% dissociation temperature | [8,8,23,26,36,76 – 78,83] |
| 1334594    | LLDRLNQL         | N (223-230)        | T-cell     | HLA-DR                     | ICS IL-2 release                                                                                                                                                                   | [73]                      |
| 1330575    | RLNQLESKM        | N (226-234)        | T-cell     | HLA-A*02:01                | ICS IFN $\gamma$ , TNF $\alpha$ release                                                                                                                                            | [78]                      |

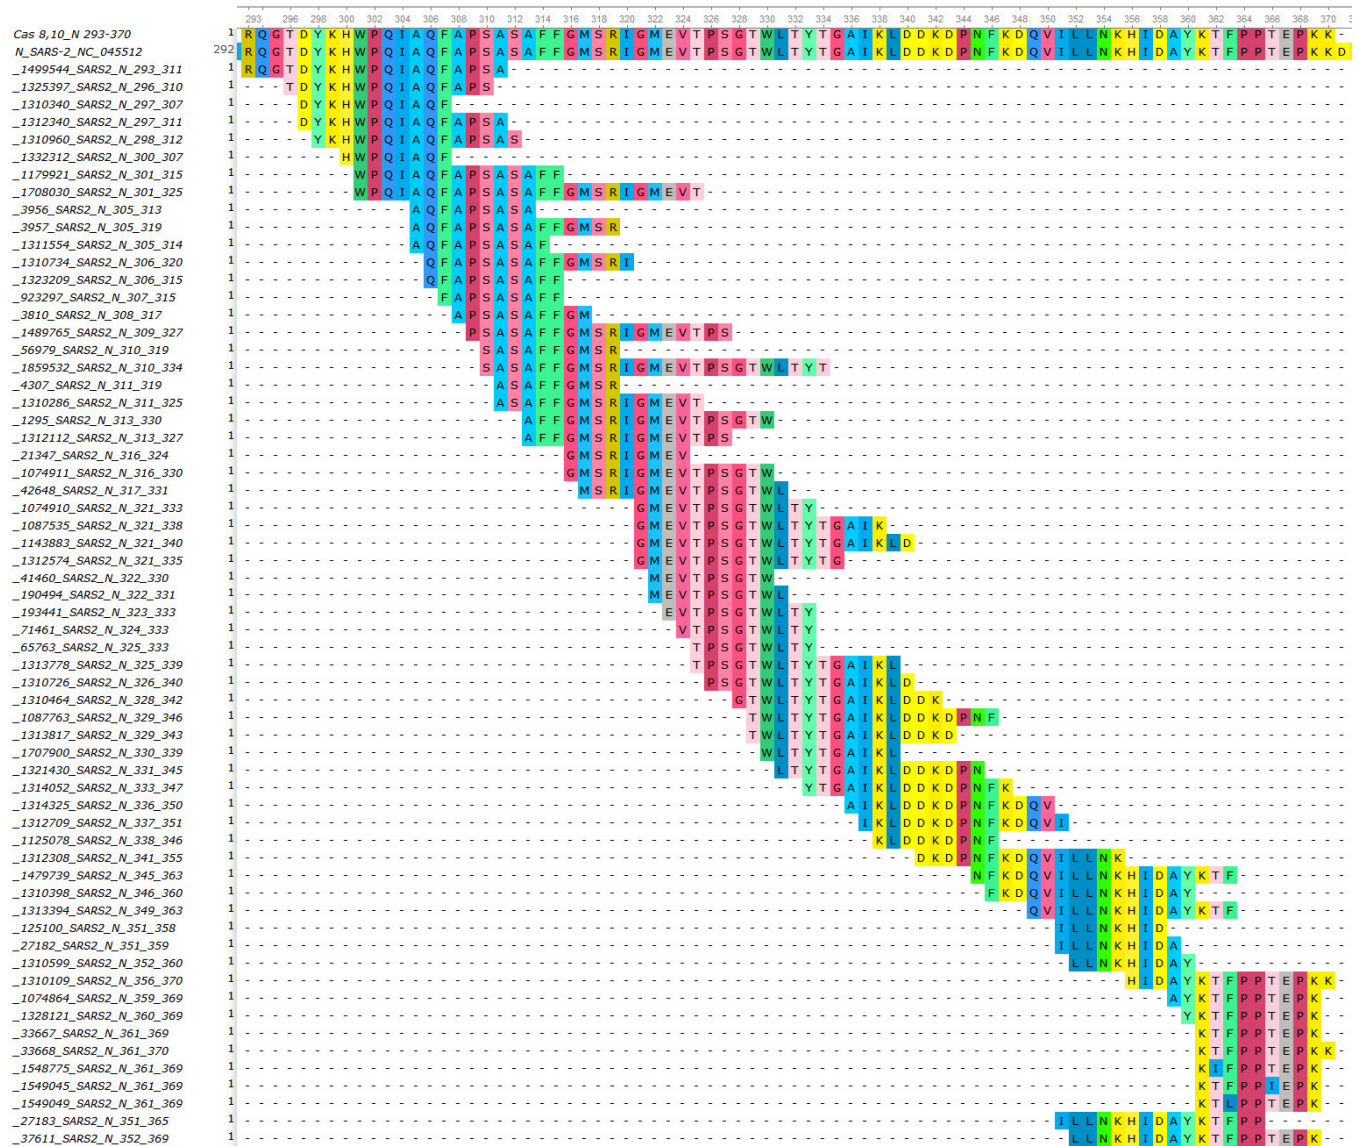

**Figure S7.** 293-370 fragments of nucleocapsid protein aligned with peptides established as immunogenic/MHC molecule binding epitopes in experimental studies. This fragment is a part of cassettes #8 and #10. Epitopes' IDs in Immune Epitope Database are indicated on the left. References and additional information regarding these epitopes are listed in Table S9. This fragment corresponds to a large fragment of dimerization domain of N [82].



**Table S9.** Epitopes in 214-235 fragment of nucleocapsid protein, deposited in IEDB, additional information and references

| Epitope ID | Epitope sequence              | Protein (position) | Assay type | Allele                                                                  | Assay                                                                                                                           | Ref       |
|------------|-------------------------------|--------------------|------------|-------------------------------------------------------------------------|---------------------------------------------------------------------------------------------------------------------------------|-----------|
| 1156855    | LIRQGTDYKHWPQIA               | N (291-305)        | T-cell     | HLA class II                                                            | biological activity activation<br>ICS IFN $\gamma$ , TNF $\alpha$ release                                                       | [5,65,70] |
| 1499544    | RQGTDYKHWPQIAQF<br>APSA       | N (293-311)        | T-cell     | HLA class II                                                            | ELISA IFN $\gamma$ release                                                                                                      | [11]      |
| 1325397    | TDYKHWPQIAQFAPS               | N (296-310)        | T-cell     | HLA class II                                                            | biological activity activation<br>ICS IFN $\gamma$ release                                                                      | [5,65]    |
|            |                               |                    | B-cell     |                                                                         | ELISA qualitative binding                                                                                                       | [21]      |
| 1310340    | DYKHWPQIAQF                   | N (297-307)        | T-cell     | HLA-A*24:02                                                             | ELISPOT IFN $\gamma$ release<br>ICS IFN $\gamma$ , TNF $\alpha$ release                                                         | [52,57]   |
| 1312340    | DYKHWPQIAQFAPSA               | N (297-311)        | T-cell     | HLA class II                                                            | ELISA IFN $\gamma$ release                                                                                                      | [11]      |
| 1310960    | YKHWPQIAQFAPSAS               | N (298-312)        | T-cell     | HLA-DR                                                                  | ELISPOT IFN $\gamma$ release<br>ICS IFN $\gamma$ , TNF $\alpha$ release                                                         | [52,57]   |
| 1332312    | HWPQIAQF                      | N (300-307)        | T-cell     | HLA-A*24:02                                                             | multimer/tetramer qualitative binding                                                                                           | [4]       |
| 1708030    | WPQIAQFAPSASAFFG<br>MSRIGMEVT | N (301-325)        | T-cell     | HLA class I                                                             | biological activity activation                                                                                                  | [22]      |
| 3956       | AQFAPSASA                     | N (305-313)        | T-cell     | HLA-A*02:01                                                             | ICS IFN $\gamma$ release                                                                                                        | [17,29]   |
|            |                               |                    |            |                                                                         | cellular MHC/direct/fluorescence qualitative binding                                                                            | [6,24,32] |
|            |                               |                    |            |                                                                         | purified MHC/competitive/radioactivity dissociation constant KD (~IC50)                                                         |           |
|            |                               |                    | MHC        | HLA-A*02:01<br>HLA-A*02:02<br>HLA-A*02:03<br>HLA-A*02:06<br>HLA-B*52:01 | purified MHC/competitive/radioactivity half maximal inhibitory concentration (IC50)                                             |           |
| 3957       | AQFAPSASAFFGMSR               | N (305-319)        |            |                                                                         | ELISA IFN $\gamma$ release<br>ICS IFN $\gamma$ release                                                                          | [2,89,90] |
|            |                               |                    | T-cell     | HLA class I, II                                                         | High throughput multiplexed assay T cell binding                                                                                |           |
| 1311554    | AQFAPSASAF                    | N (305-314)        | T-cell     | HLA-B*15:01<br>HLA-A*24:02                                              | ICS IFN $\gamma$ release<br>multimer/tetramer qualitative binding                                                               | [4,51,68] |
| 1310734    | QFAPSASAFFGMSRI               | N (306-320)        | T-cell     | HLA-DRB1*07:01<br>HLA class II                                          | biological activity activation<br>ICS IFN $\gamma$ release                                                                      | [5,65]    |
|            |                               |                    | B-cell     |                                                                         | ELISA qualitative binding                                                                                                       | [21]      |
| 1323209    | QFAPSASAFF                    | N (306-315)        | T-cell     | HLA-A*24:02                                                             | biological activity activation                                                                                                  | [5]       |
| 923297     | FAPSASAFF                     | N (307-315)        | T-cell     | HLA-B*35:01<br>HLA class I                                              | biological activity activation<br>ELISPOT IFN $\gamma$ release                                                                  | [5,62,91] |
|            |                               |                    | MHC        | HLA-C*01:02                                                             | purified MHC qualitative binding                                                                                                | [45]      |
| 3810       | APSASAFFGM                    | N (308-317)        | T-cell     | HLA-B*07:02                                                             | biological activity activation<br>multimer/tetramer qualitative binding                                                         | [4,5]     |
|            |                               |                    | MHC        | HLA-B*07:02<br>HLA-B*35:01<br>HLA-B*53:01<br>HLA-B*51:01<br>HLA-B*81:01 | cellular MHC/direct/fluorescence qualitative binding<br>purified MHC/competitive/radioactivity dissociation constant KD (~IC50) | [6,24]    |
| 1489765    | PSASAFFGMSRIGMEVT<br>PS       | N (309-327)        | T-cell     | HLA class II                                                            | ELISA IFN $\gamma$ release                                                                                                      | [11]      |
| 56979      | SASAFFGMSR                    | N (310-319)        | T-cell     | HLA-A*68:01                                                             | biological activity activation                                                                                                  | [5]       |

| Epitope ID | Epitope sequence              | Protein (position) | Assay type | Allele                                                                   | Assay                                                                                                                                                                                                          | Ref                                       |
|------------|-------------------------------|--------------------|------------|--------------------------------------------------------------------------|----------------------------------------------------------------------------------------------------------------------------------------------------------------------------------------------------------------|-------------------------------------------|
|            |                               |                    | MHC        | HLA-A*11:01<br>HLA-A*31:01<br>HLA-A*68:01<br>HLA-A*33:01<br>HLA-A*03:01  | purified<br>MHC/competitive/radioactivity<br>dissociation constant KD (~IC50) -                                                                                                                                | [6]                                       |
| 1859532    | SASAFFGMSRIGMEVTP<br>SGTWLTYT | N (310-319)        | T-cell     | HLA class I, HLA<br>class II                                             | biological activity activation<br>ELISPOT IFN $\gamma$ release                                                                                                                                                 | [69]                                      |
| 4307       | ASAFFGMSR                     | N (311-319)        | T-cell     | HLA-A*11:01<br>HLA-A*68:01                                               | in vitro assay cytotoxicity<br>biological activity activation                                                                                                                                                  | [5,53]                                    |
|            |                               |                    | MHC        | HLA-A*11:01<br>HLA-A*31:01<br>HLA-A*68:01<br>HLA-A*03:01                 | purified<br>MHC/competitive/radioactivity<br>dissociation constant KD (~IC50)                                                                                                                                  | [6]                                       |
| 1310286    | ASAFFGMSRIGMEVT               | N (311-325)        | T-cell     | HLA-DRB1*14:01<br>HLA-DQB1*05:03<br>HLA-DQB1*05:03<br>HLA-DR11<br>HLA-DR | biological activity activation<br>ELISPOT IFN $\gamma$ release<br>ICS IFN $\gamma$ release<br>ICS IL-2 release<br>ICS TNF release                                                                              | [5,52,5<br>7,73]                          |
| 1295       | AFFGMSRIGMEVTPSGT<br>W        | N (313-330)        | T-cell     | n/d                                                                      | ELISPOT IFN $\gamma$ release                                                                                                                                                                                   | [50,92]                                   |
| 1312112    | AFFGMSRIGMEVTPS               | N (313-327)        | T-cell     | HLA class II                                                             | ELISPOT IFN $\gamma$ release                                                                                                                                                                                   | [93]                                      |
| 21347      | GMSRIGMEV                     | N (316-324)        | T-cell     | HLA-A*02:01                                                              | 51 chromium cytotoxicity<br>biological activity activation<br>ELISA IFN $\gamma$ release<br>ICS IFN $\gamma$ , TNF $\alpha$ release<br>in vitro assay cytotoxicity<br>multimer/tetramer qualitative<br>binding | [4,5,8,2<br>6,28,76<br>-<br>78,83,9<br>4] |
| 1074911    | GMSRIGMEVTPSGTW               | N (316-330)        | T-cell     | HLA class I, HLA<br>class II                                             | High throughput multiplexed<br>assay T cell binding<br>ICS IFN $\gamma$ release                                                                                                                                | [2,65]                                    |
| 42648      | MSRIGMEVTPSGTWL               | N (317-331)        | T-cell     | HLA class I                                                              | ELISPOT IFN $\gamma$ release<br>ELISPOT TNF $\alpha$ release                                                                                                                                                   | [93]                                      |
|            |                               |                    | MHC        | HLA-DRB1*01:01                                                           | purified<br>MHC/competitive/radioactivity<br>dissociation constant KD (~IC50)                                                                                                                                  | [40]                                      |
| 1074910    | GMEVTPSGTWLTY                 | N (321-333)        | T-cell     | HLA class I                                                              | High throughput multiplexed<br>assay<br>T cell binding                                                                                                                                                         | [2]                                       |
| 1087535    | GMEVTPSGTWLTYTGA<br>IK        | N (321-338)        | T-cell     | n/d                                                                      | ELISPOT IFN $\gamma$ release                                                                                                                                                                                   | [50]                                      |
| 1143883    | GMEVTPSGTWLTYTGA<br>IKLD      | N (321-340)        | T-cell     | HLA class I<br>HLA class II<br>HLA-DRB1*07:01<br>HLA-DRB5*01:01          | binding assay qualitative binding<br>ICS IFN $\gamma$ release<br>ICS TNF $\alpha$ release                                                                                                                      | [70,95]                                   |
| 1312574    | GMEVTPSGTWLTYTG               | N (321-335)        | T-cell     | HLA class I<br>HLA class II                                              | biological activity activation<br>ELISPOT IFN $\gamma$ release<br>ELISPOT TNF $\alpha$ release<br>ICS IFN $\gamma$ release                                                                                     | [58,65,<br>93]                            |
| 41460      | MEVTPSGTW                     | (N-322-330)        | T-cell     | HLA-B*44:03                                                              | biological activity degranulation<br>ICS IFN $\gamma$ release<br>multimer/tetramer qualitative<br>binding                                                                                                      | [51]                                      |
| 190494     | MEVTPSGTWL                    | N (322-331)        | T-cell     | HLA-B*40:01                                                              | biological activity activation<br>biological activity degranulation<br>ELISPOT IFN $\gamma$ release                                                                                                            | [5,17,4<br>7,50,51<br>,57,67,             |

| Epitope ID | Epitope sequence    | Protein (position) | Assay type | Allele                                                                                                                                                                           | Assay                                                                                                                                                     | Ref       |
|------------|---------------------|--------------------|------------|----------------------------------------------------------------------------------------------------------------------------------------------------------------------------------|-----------------------------------------------------------------------------------------------------------------------------------------------------------|-----------|
|            |                     |                    |            |                                                                                                                                                                                  | ICS IFN $\gamma$ , TNF $\alpha$<br>in vitro assay cytotoxicity<br>ICS granzyme B release<br>ICS perforin release<br>multimer/tetramer qualitative binding | 68,96–98] |
| 193441     | EVTPSGTWLTY         | N (323-333)        | T-cell     | HLA-A*26:01                                                                                                                                                                      | biological activity activation                                                                                                                            | [5]       |
| 71461      | VTPSGTWLTY          | N (324-333)        | T-cell     | HLA-A*30:02                                                                                                                                                                      | biological activity activation                                                                                                                            | [5]       |
|            |                     |                    | MHC        | HLA-A*30:02<br>HLA-A*29:02<br>HLA-A*26:01<br>HLA-A*01:01                                                                                                                         | purified<br>MHC/competitive/radioactivity<br>dissociation constant KD (~IC50)                                                                             | [6]       |
| 65763      | TPSGTWLTY           | N (325-333)        | T-cell     | HLA-B*35:01                                                                                                                                                                      | biological activity activation                                                                                                                            | [5,67]    |
|            |                     |                    | MHC        | HLA-A*29:02<br>HLA-A*11:01                                                                                                                                                       | purified MHC/direct/fluorescence<br>dissociation constant KD (~EC50)                                                                                      | [6,99]    |
| 1313778    | TPSGTWLTYTGAIKL     | N (325-339)        | T-cell     | HLA class I                                                                                                                                                                      | ELISPOT IFN $\gamma$ release                                                                                                                              | [58]      |
| 1310726    | PSGTWLTYTGAIKLD     | N (326-340)        |            | HLA-DRB1*01:02<br>HLA-DQB1*06:03<br>HLA-DQB1*06:03<br>HLA-DRB1*15:01<br>HLA class II                                                                                             | biological activity activation<br>ELISPOT IFN $\gamma$ release<br>ELISPOT IL-5 release<br>ICS IFN $\gamma$ release                                        | [5,13,65] |
|            |                     |                    | B-cell     |                                                                                                                                                                                  | ELISA qualitative binding                                                                                                                                 | [21]      |
|            |                     |                    |            | HLA-DRB1*15:01<br>HLA-DRB5*01:01<br>HLA-DRB3*01:01<br>HLA-DRB1*07:01<br>HLA-DRB1*03:01<br>HLA-DRB1*11:01<br>HLA-DRB1*08:02<br>HLA-DRB1*04:01<br>HLA-DRB1*12:01<br>HLA-DRB1*04:05 | purified<br>MHC/competitive/radioactivity<br>half maximal inhibitory<br>concentration (IC50)                                                              | [5]       |
|            |                     |                    | MHC        |                                                                                                                                                                                  |                                                                                                                                                           |           |
| 1310464    | GTWLTYTGAIKLDDK     | N (328-342)        |            |                                                                                                                                                                                  | biological activity activation<br>ELISPOT IFN $\gamma$ release<br>ICS IFN $\gamma$ , TNF $\alpha$ release                                                 | [52,57]   |
|            |                     |                    | T-cell     | HLA-DR                                                                                                                                                                           |                                                                                                                                                           |           |
| 1087763    | TWLTYTGAIKLDDKDPNF  | N (329-346)        | T-cell     | HLA class II                                                                                                                                                                     | ELISPOT IFN $\gamma$ release                                                                                                                              | [50]      |
| 1313817    | TWLTYTGAIKLDDKD     | N (329-343)        | T-cell     | HLA class II                                                                                                                                                                     | ELISA IFN $\gamma$ release                                                                                                                                | [11]      |
| 1707900    | WLTYTGAIKL          | N (330-339)        |            | HLA class II                                                                                                                                                                     | ICS IFN $\gamma$ release                                                                                                                                  | [8]       |
|            |                     |                    | T-cell     | HLA-A*02:01                                                                                                                                                                      |                                                                                                                                                           |           |
| 1321430    | LTYTGAIKLDDKDPN     | N (331-345)        |            | HLA class II                                                                                                                                                                     | ICS IFN $\gamma$ release                                                                                                                                  | [5,65]    |
|            |                     |                    | T-cell     | HLA-DRB1*07:01                                                                                                                                                                   | biological activity activation                                                                                                                            |           |
| 1314052    | YTGAIKLDDKDPNFK     | N (333-347)        | T-cell     | HLA class II                                                                                                                                                                     | ICS IFN $\gamma$ release                                                                                                                                  | [8]       |
| 1314325    | AIKLDDKDPNFKDQV     | N (336-350)        |            | HLA class II                                                                                                                                                                     | ICS IFN $\gamma$ release                                                                                                                                  | [5,65]    |
|            |                     |                    | T-cell     | HLA-DRB1*03:01                                                                                                                                                                   | biological activity activation                                                                                                                            |           |
| 1312709    | IKLDDKDPNFKDQVI     | N (337-351)        | T-cell     | HLA class I, II                                                                                                                                                                  | biological activity activation<br>ELISPOT IFN $\gamma$ release                                                                                            | [58]      |
| 1125078    | KLDDKDPNF           | N (338-346)        |            |                                                                                                                                                                                  | ELISPOT IFN $\gamma$ release<br>multimer/tetramer qualitative<br>binding                                                                                  | [30,41]   |
|            |                     |                    | T-cell     | HLA-A*02:01                                                                                                                                                                      |                                                                                                                                                           |           |
| 1312308    | DKDPNFKDQVILLNK     | N (341-355)        | T-cell     | n/d                                                                                                                                                                              | ELISPOT IFN $\gamma$ release                                                                                                                              | [65]      |
| 1309135    | PNFKDQVILLNKHIDAYK  | N (344-361)        | T-cell     | HLA class II                                                                                                                                                                     | ELISPOT IFN $\gamma$ release                                                                                                                              | [92]      |
| 1479739    | NFKDQVILLNKHIDAYKTF | N (345-363)        | T-cell     | HLA class II                                                                                                                                                                     | ELISA IFN $\gamma$ release                                                                                                                                | [11]      |
| 1310398    | FKDQVILLNKHIDAY     | N (346-360)        | T-cell     | HLA-DRB1*16:02                                                                                                                                                                   | biological activity activation                                                                                                                            | [5,65]    |

| Epitope ID | Epitope sequence | Protein (position) | Assay type | Allele                                                                                                                                                                                                                                                                                                                                                                                                                                                                                                                                                                                                                                                                                       | Assay                                                                               | Ref    |
|------------|------------------|--------------------|------------|----------------------------------------------------------------------------------------------------------------------------------------------------------------------------------------------------------------------------------------------------------------------------------------------------------------------------------------------------------------------------------------------------------------------------------------------------------------------------------------------------------------------------------------------------------------------------------------------------------------------------------------------------------------------------------------------|-------------------------------------------------------------------------------------|--------|
|            |                  |                    |            | HLA-DRB1*15:01<br>HLA-DRB1*14:06<br>HLA-DRB1*14:01<br>HLA class II<br>HLA-DRB1*03:01<br>HLA class II<br>HLA-DRB1*03:01<br>HLA-DRB1*04:01<br>HLA-DRB1*09:01<br>HLA-DRB1*11:01<br>HLA-DRB1*12:01<br>HLA-DRB3*01:01<br>HLA-DRB4*01:01<br>HLA-DRB5*01:01<br>HLA-DRB1*16:02<br>HLA-DRB1*15:01<br>HLA-DQB1*06:02<br>HLA-DRB1*14:01<br>HLA-DPB1*02:01<br>HLA-DPA1*01:03/DPB1*04:01<br>HLA-DQA1*01:02/DQB1*06:02<br>HLA-DRB1*15:01<br>HLA-DQA1*01:01/DQB1*05:01<br>HLA-DRB1*01:01<br>HLA-DRB1*07:01<br>HLA-DQA1*03:01/DQB1*03:02<br>HLA-DRB1*13:02<br>HLA-DQA1*05:01/DQB1*02:01<br>HLA-DRB1*04:05<br>HLA-DRB3*02:02<br>HLA-DRB1*08:02<br>HLA-DQA1*05:01/DQB1*03:01<br>HLA-DRB1*14:06<br>HLA class II | ICS IFN $\gamma$ release                                                            |        |
|            |                  |                    |            | HLA-DPA1*01:03/DPB1*04:01<br>HLA-DRB1*13:02<br>HLA-DRB1*01:01<br>HLA-DRB1*08:02<br>HLA-DRB1*01:01<br>HLA-DRB5*01:01<br>HLA-DRB1*15:01<br>HLA-DRB3*01:01<br>HLA-DRB3*02:02                                                                                                                                                                                                                                                                                                                                                                                                                                                                                                                    | Purified MHC/competitive/radioactivity half maximal inhibitory concentration (IC50) | [5,65] |

| Epitope ID | Epitope sequence              | Protein (position) | Assay type | Allele                                                                                                                                                                                                                                                                                                                                                                                                                                                                            | Assay                                                                                                                                                                | Ref          |
|------------|-------------------------------|--------------------|------------|-----------------------------------------------------------------------------------------------------------------------------------------------------------------------------------------------------------------------------------------------------------------------------------------------------------------------------------------------------------------------------------------------------------------------------------------------------------------------------------|----------------------------------------------------------------------------------------------------------------------------------------------------------------------|--------------|
|            |                               |                    |            | HLA-DRB1*15:01<br>HLA-DRB1*11:01<br>HLA-DRB1*07:01<br>HLA-DRB1*12:01<br>HLA-DPB1*02:01<br>HLA-DRB4*01:01<br>HLA-DRB1*08:02<br>HLA-DQA1*01:02/DQB1*06:02<br>HLA-DQA1*01:01/DQB1*05:01<br>HLA-DRB1*09:01<br>HLA-DRB1*04:05<br>HLA-DQA1*03:01/DQB1*03:02<br>HLA-DRB1*07:01<br>HLA-DRB1*04:05<br>HLA-DRB1*11:01<br>HLA-DRB1*12:01<br>HLA-DRB1*03:01<br>HLA-DQA1*05:01/DQB1*02:01<br>HLA-DRB1*04:01<br>HLA-DQA1*05:01/DQB1*03:01<br>HLA-DRB3*01:01<br>HLA-DRB5*01:01<br>HLA-DRB1*03:01 |                                                                                                                                                                      |              |
| 1313394    | QVILLNKHIDAYKTF               | N (349-363)        | T-cell     | HLA class I, II                                                                                                                                                                                                                                                                                                                                                                                                                                                                   | biological activity activation<br>ELISA IFN $\gamma$ release                                                                                                         | [11,58]      |
| 1860344    | VILLNKHIDAYKTFPPT<br>EPKKDKKK | N (350-374)        | T-cell     | HLA class I, II                                                                                                                                                                                                                                                                                                                                                                                                                                                                   | biological activity activation<br>ELISPOT IFN $\gamma$ release                                                                                                       | [69]         |
| 27182      | ILLNKHIDA                     | N (351-359)        | T-cell     | HLA class I<br>HLA-A*02:01                                                                                                                                                                                                                                                                                                                                                                                                                                                        | ELISPOT IFN $\gamma$ release<br>High throughput multiplexed assay T cell binding<br>ICS IFN $\gamma$ , TNF $\alpha$ release<br>multimer/tetramer qualitative binding | [2,28,77,78] |
| 27183      | ILLNKHIDAYKTFPP               | N (351-365)        | T-cell     | HLA-DRB1*14:06<br>HLA-DRB1*15:01<br>HLA class II                                                                                                                                                                                                                                                                                                                                                                                                                                  | biological activity activation<br>ELISPOT IFN $\gamma$ release<br>ICS IFN $\gamma$ release                                                                           | [5,65]       |
|            |                               |                    | MHC        | HLA-DRB1*15:01<br>HLA-DRB1*01:01<br>HLA-DRB1*11:01<br>HLA-DRB1*04:05<br>HLA-DRB3*01:01<br>HLA-DRB1*07:01<br>HLA-DRB1*08:02<br>HLA-DRB5*01:01                                                                                                                                                                                                                                                                                                                                      | purified<br>MHC/competitive/radioactivity<br>half maximal inhibitory concentration (IC50)                                                                            | [5]          |
| 125100     | ILLNKHID                      | N (351-358)        | T-cell     | HLA-A*02:01                                                                                                                                                                                                                                                                                                                                                                                                                                                                       | ELISPOT IFN $\gamma$ release<br>ICS IFN $\gamma$ , TNF $\alpha$ release                                                                                              | [77,78]      |

| Epitope ID | Epitope sequence   | Protein (position) | Assay type | Allele                                                   | Assay                                                                                                                                                                                                                                         | Ref                         |
|------------|--------------------|--------------------|------------|----------------------------------------------------------|-----------------------------------------------------------------------------------------------------------------------------------------------------------------------------------------------------------------------------------------------|-----------------------------|
| 37611      | LLNKHIDAYKTFPPTEPK | N (352-369)        | T-cell     | HLA-A*03:01<br>HLA-A*11:01<br>+ n/d                      | ELISPOT IFN $\gamma$ release                                                                                                                                                                                                                  | [50,92,100,101]             |
| 1310599    | LLNKHIDAY          | N (352-360)        | T-cell     | HLA-B*15:01                                              | multimer/tetramer qualitative binding                                                                                                                                                                                                         | [4]                         |
| 1310109    | HIDAYKTFPPTEPKK    | N (356-370)        | T-cell     | HLA class II                                             | biological activity activation<br>ICS IFN $\gamma$ release                                                                                                                                                                                    | [5,65]                      |
|            |                    |                    | B-cell     |                                                          | ELISA qualitative binding                                                                                                                                                                                                                     | [21]                        |
| 1074864    | AYKTFPPTEPK        | N (359-369)        | T-cell     |                                                          | High throughput multiplexed assay<br>T cell binding                                                                                                                                                                                           | [2]                         |
| 1328121    | YKTFPPTEPK         | N (360-369)        | T-cell     | HLA-A*68:01<br>HLA-A*11:01<br>HLA class II               | biological activity activation<br>ICS IFN $\gamma$ , TNF $\alpha$ release<br>in vitro assay cytotoxicity<br>multimer/tetramer qualitative binding                                                                                             | [5,8]                       |
| 33667      | KTFPPTEPK          | N (361-369)        | T-cell     | HLA-A*03:01<br>HLA-A*31:01<br>HLA-A*11:01<br>HLA-A*68:01 | biological activity activation<br>ELISA IFN $\gamma$ release<br>ELISA IL-2 release<br>ELISA TNF $\alpha$ release<br>ICS IFN $\gamma$ release                                                                                                  | [4,5,30,43,50,53,55,96,102] |
|            |                    |                    | MHC        | HLA-A*03:01<br>HLA-A*31:01<br>HLA-A*11:01<br>HLA-A*68:01 | cellular MHC/mass spectrometry<br>ligand presentation<br>purified<br>MHC/competitive/fluorescence<br>qualitative binding<br>purified<br>MHC/competitive/radioactivity<br>dissociation constant KD (~IC50)<br>purified MHC qualitative binding | [6,44,45,75,99,102–104]     |
| 33668      | KTFPPTEPKK         | N (361-370)        | T-cell     | HLA-A*03:01<br>HLA-A*11:01                               | biological activity activation<br>ELISPOT IFN $\gamma$ release<br>ICS IFN $\gamma$ release                                                                                                                                                    | [5,17,57]                   |
|            |                    |                    | MHC        | HLA-A*03:01<br>HLA-A*31:01<br>HLA-A*11:01<br>HLA-A*68:01 | purified<br>MHC/competitive/radioactivity<br>dissociation constant KD (~IC50)                                                                                                                                                                 | [6]                         |
| 33669      | KTFPPTEPKKDKKKK    | N (361-375)        | T-cell     | HLA class II                                             | ICS IFN $\gamma$ release                                                                                                                                                                                                                      | [65]                        |
|            |                    |                    | B-cell     |                                                          | biological activity agglutination<br>ELISA qualitative binding<br>Microarray qualitative binding                                                                                                                                              | [79,105]                    |
| 1319977    | KTFPPTEPKKDKKKK    | N (361-374)        | T-cell     | HLA-A*03:01                                              | biological activity activation                                                                                                                                                                                                                | [5]                         |
| 1548775    | KIFPPTEPK          | N (361-369)        | T-cell     | HLA-A*11:01                                              | ELISA IFN $\gamma$ release                                                                                                                                                                                                                    | [30]                        |
| 1549045    | KTFPPTEPK          | N (361-369)        | T-cell     | HLA-A*11:01                                              | ELISA IFN $\gamma$ release                                                                                                                                                                                                                    | [30]                        |
| 1549049    | KTLPPTEPK          | N (361-369)        | T-cell     | HLA-A*11:01                                              | ELISA IFN $\gamma$ release                                                                                                                                                                                                                    | [30]                        |

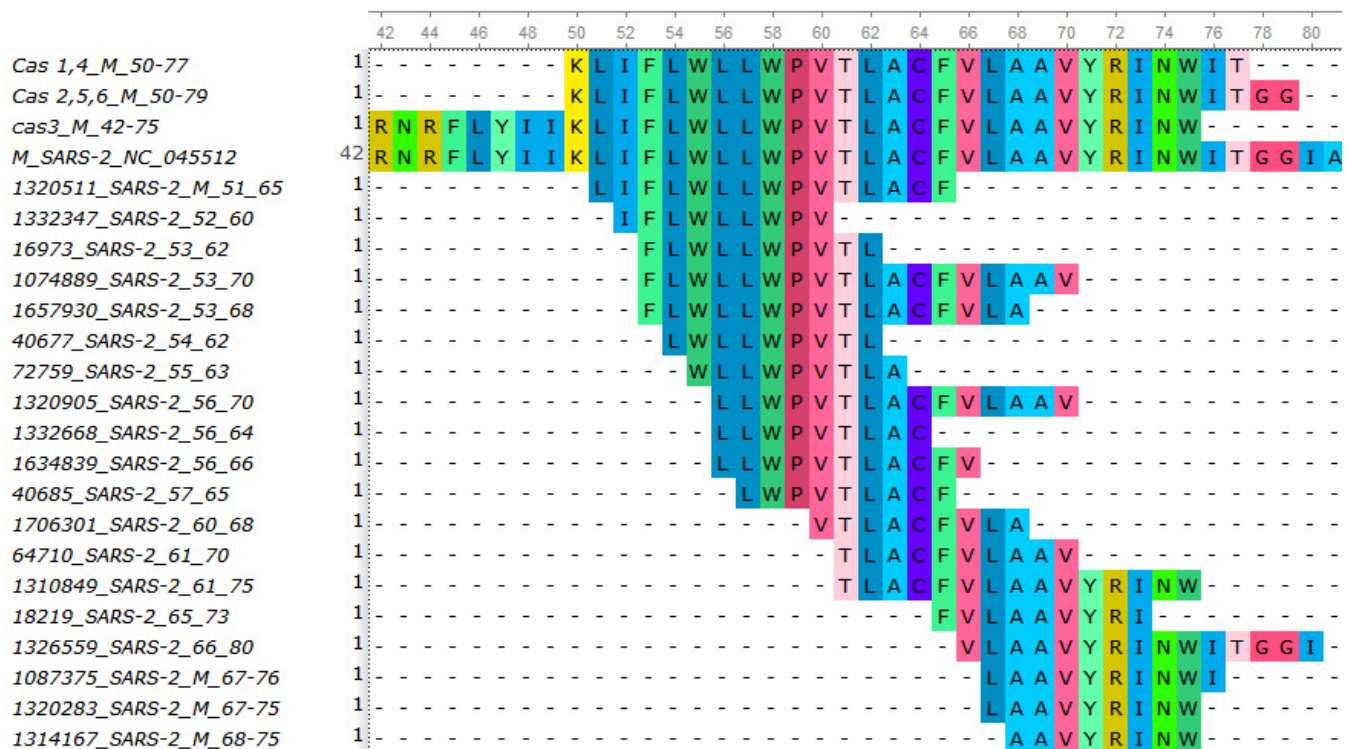

**Figure S8.** 42-79 fragments of membrane protein aligned with peptides established as immunogenic/MHC molecule binding epitopes in experimental studies. This fragment is a part of cassettes #1-6. Epitopes' IDs in Immune Epitope Database are indicated on the left. References and additional information regarding these epitopes are listed in Table S10. This fragment corresponds to transmembrane helix 2 and linker to 3<sup>rd</sup> helix [106].

**Table S10.** Epitopes in 42-79 fragment of membrane protein, deposited in IEDB, additional information and references

| Epitope ID | Epitope sequence     | Protein (position) | Assay type | Allele                                                                  | Assay                                                                                                                                 | Ref        |
|------------|----------------------|--------------------|------------|-------------------------------------------------------------------------|---------------------------------------------------------------------------------------------------------------------------------------|------------|
| 1320511    | LIFLWLLWPV<br>TLACF  | M (51-65)          | T-cell     | HLA-DQB1*05:01<br>HLA-DRB1*01:02<br>HLA-DQB1*05:03<br>HLA class II      | biological activity activation<br>ICS IFN $\gamma$ release                                                                            | [5,65]     |
| 1332347    | IFLWLLWPV            | M (52-60)          | T-cell     | HLA-A*02:01                                                             | ELISPOT IFN $\gamma$ release                                                                                                          | [15]       |
| 16973      | FLWLLWPVT<br>L       | M (53-62)          | T-cell     | HLA-A*02:01                                                             | multimer/tetramer qualitative binding                                                                                                 | [4,31]     |
|            |                      |                    | T-cell     | HLA-A*02:01<br>HLA-A*02:02<br>HLA-A*02:03<br>HLA-A*02:06                | cellular MHC/direct/fluorescence<br>qualitative binding<br>purified MHC/competitive/radioactivity<br>dissociation constant KD (~IC50) | [6,32,107] |
| 1074889    | FLWLLWPVT<br>LACFVLA | M (53-70)          | T-cell     | HLA class I                                                             | High throughput multiplexed assay T cell binding                                                                                      | [5]        |
| 1657930    | FLWLLWPVT<br>LACFVLA | M (53-68)          | T-cell     | HLA class I, II                                                         | biological activity, activation                                                                                                       | [22]       |
| 40677      | LWLLWPVTL            | M (54-62)          | T-cell     | HLA-A*24:02                                                             | ICS IFN $\gamma$ release                                                                                                              | [54]       |
|            |                      |                    | MHC        | HLA-A*23:01<br>HLA-A*24:02<br>HLA-A*29:02                               | purified MHC/competitive/radioactivity<br>dissociation constant KD (~IC50)                                                            | [6]        |
| 72759      | WLLWPVTLA            | M (55-63)          | T-cell     | HLA-A*02:01                                                             | ICS IFN $\gamma$ release                                                                                                              | [29]       |
|            |                      |                    | MHC        | HLA-A*02:01<br>HLA-A*02:02<br>HLA-A*02:03<br>HLA-A*02:06<br>HLA-A*68:02 | purified MHC/competitive/radioactivity<br>half maximal inhibitory concentration (IC50)                                                | [6,32]     |



| Epitope ID | Epitope sequence | Protein (position) | Assay type | Allele                                                                                                                                                                                                               | Assay                                                                                                                                                                                                                                                 | Ref                |
|------------|------------------|--------------------|------------|----------------------------------------------------------------------------------------------------------------------------------------------------------------------------------------------------------------------|-------------------------------------------------------------------------------------------------------------------------------------------------------------------------------------------------------------------------------------------------------|--------------------|
| 1320905    | LLWPVTLACFVLA    | M (56-70)          | T-cell     | HLA-DQB1*05:03<br>HLA-DQB1*06:03<br>HLA-DQB1*05:01<br>HLA class II                                                                                                                                                   | biological activity activation<br>ICS IFN $\gamma$ release                                                                                                                                                                                            | [5,65]             |
| 1332668    | LLWPVTLAC        | M (56-64)          | T-cell     | HLA-A*02:01                                                                                                                                                                                                          | multimer/tetramer qualitative binding                                                                                                                                                                                                                 | [4]                |
| 1634839    | LLWPVTLACFV      | M (56-66)          | T-cell     | HLA-A*02:01                                                                                                                                                                                                          | multimer/tetramer qualitative binding                                                                                                                                                                                                                 | [31]               |
| 40685      | LWPVTLACF        | M (57-65)          | T-cell     | HLA-A*24:02                                                                                                                                                                                                          | ICS IFN $\gamma$ release                                                                                                                                                                                                                              | [8,54]             |
| 1706301    | VTLACFVLA        | M (60-68)          | T-cell     | HLA-A*02:06<br>HLA class II                                                                                                                                                                                          | CFSE proliferation<br>ICS IFN $\gamma$ release                                                                                                                                                                                                        | [8]                |
| 64710      | TLACFVLA         | M (61-70)          | T-cell     | HLA-A*02:01<br>HLA-A*02:07<br>HLA class I                                                                                                                                                                            | CFSE proliferation<br>ELISPOT IFN $\gamma$ release<br>ICS IFN $\gamma$ release<br>multimer/tetramer qualitative binding                                                                                                                               | [8,27,28,62,107]   |
|            |                  |                    | MHC        | HLA-A*02:01<br>HLA-A*02:02<br>HLA-A*02:03<br>HLA-A*02:06<br>HLA-A*02:07<br>HLA-A*68:02                                                                                                                               | purified MHC qualitative binding purified MHC/competitive/radioactivity half maximal inhibitory concentration (IC50)<br>purified MHC/direct/fluorescence 50% dissociation temperature<br>cellular MHC/competitive/fluorescence qualitative binding    | [6,8,27,32,47,107] |
| 1310849    | TLACFVLAAYRINW   | M (61-75)          | T-cell     | n/d                                                                                                                                                                                                                  | ELISPOT IFN $\gamma$ release                                                                                                                                                                                                                          | [65]               |
|            |                  |                    | B-cell     |                                                                                                                                                                                                                      | ELISA qualitative binding                                                                                                                                                                                                                             | [21]               |
| 18219      | FVLAAYRI         | M (65-73)          | T-cell     | HLA-A*02:01<br>HLA-A*68:02                                                                                                                                                                                           | 51 chromium cytotoxicity<br>biological activity activation<br>ICS IFN $\gamma$ , TNF $\alpha$ release<br>multimer/tetramer qualitative binding                                                                                                        | [4,5,8,27,31]      |
|            |                  |                    | MHC        | HLA-A*02:01<br>HLA-A*02:02<br>HLA-A*02:03<br>HLA-A*02:06<br>HLA-A*02:07<br>HLA-A*68:02                                                                                                                               | purified MHC qualitative binding<br>purified MHC/competitive/radioactivity half maximal inhibitory concentration (IC50)<br>purified MHC/direct/fluorescence 50% dissociation temperature<br>cellular MHC/competitive/fluorescence qualitative binding | [6,8,27,31,32]     |
| 1326559    | VLAAYRINWITGGI   | M (66-80)          | T-cell     | HLA-DRB1*12:02<br>HLA-DQB1*05:03<br>HLA-DRB1*14:01<br>HLA-DQB1*05:01<br>HLA class II                                                                                                                                 | biological activity activation<br>ICS IFN $\gamma$ release                                                                                                                                                                                            | [5,65]             |
|            |                  |                    | MHC        | HLA-DRB1*15:01<br>HLA-DRB1*09:01<br>HLA-DRB5*01:01<br>HLA-DRB1*11:01<br>HLA-DRB3*02:02<br>HLA-DRB1*07:01<br>HLA-DRB1*04:05<br>HLA-DRB1*08:02<br>HLA-DRB4*01:01<br>HLA-DRB1*01:01<br>HLA-DRB1*04:01<br>HLA-DRB1*13:02 | purified MHC/competitive/radioactivity half maximal inhibitory concentration (IC50)                                                                                                                                                                   | [5]                |
| 1087375    | LAAYRINWI        | M (67-76)          | T-cell     | HLA class I                                                                                                                                                                                                          | High throughput multiplexed assay T cell binding                                                                                                                                                                                                      | [2]                |
| 1320283    | LAAYRINW         | M (67-75)          | T-cell     | HLA-B*57:01                                                                                                                                                                                                          | biological activity activation                                                                                                                                                                                                                        | [5]                |
| 1314167    | AAVYRINW         | M (68-75)          | T-cell     | HLA-B*57:01                                                                                                                                                                                                          | biological activity activation                                                                                                                                                                                                                        | [5]                |

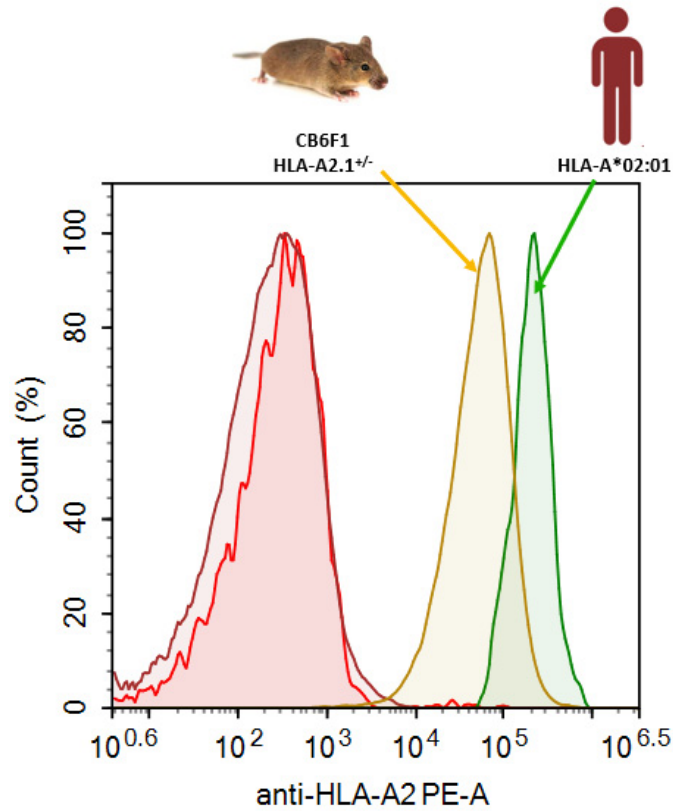

**Figure S9.** Expression of the HLA-A2 molecules on the mouse splenic cells and HLA-A\*02:01 positive donor as detected using the PE Anti-HLA A2 antibody [BB7.2]. Whole blood was stained with antibody and the cells were processed on a flow cytometer.

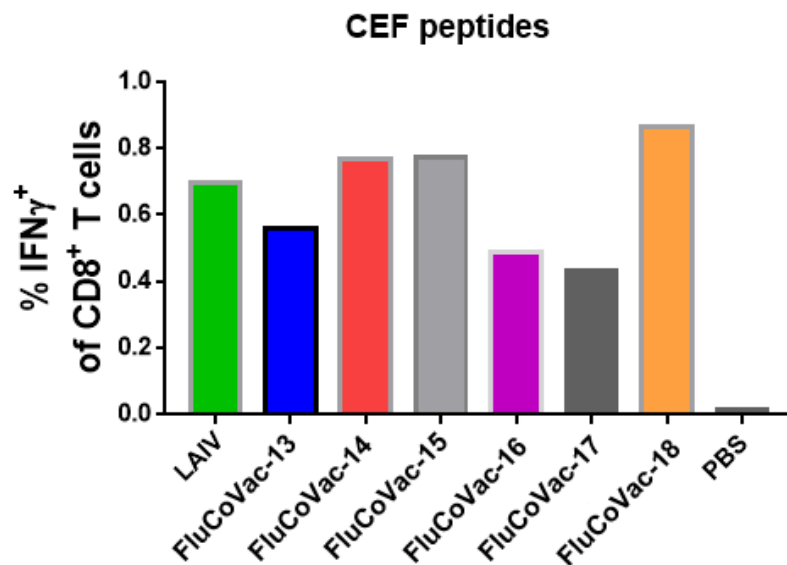

**Figure S10.** Levels of IFN $\gamma$ -producing cytotoxic T cells after stimulation of mouse splenocytes with CEF peptide mix. Mice were immunized twice with  $10^6$  EID<sub>50</sub> of each test virus within a 3-week interval. On day 10 post second dose splenocytes (n=7) were collected and CEF-specific CTL response was assessed by ICS assay.

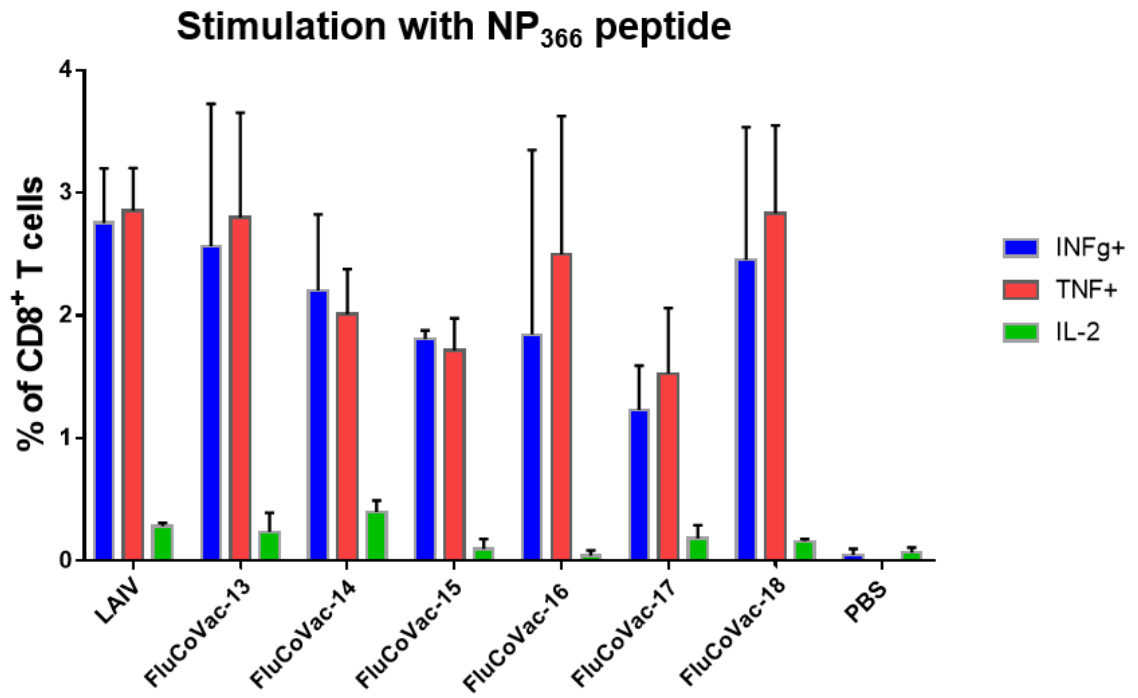

**Figure S11.** Levels of cytokine-producing cytotoxic T cells after stimulation of mouse splenocytes with influenza NP<sub>366</sub> peptide. Mice were immunized twice with 10<sup>6</sup> EID<sub>50</sub> of each test virus within a 3-week interval. On day 10 post second dose splenocytes (n=7) were collected and NP<sub>366</sub>-specific CTL response was assessed by ICS assay.

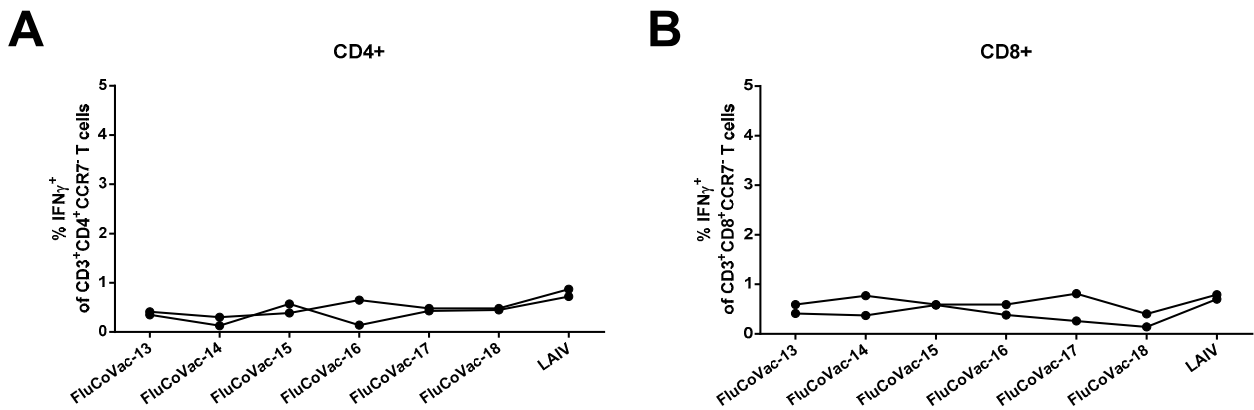

**Figure S12.** The levels of IFN<sub>γ</sub>-producing helper (A) and effector memory (B) T cell subsets in PBMC samples of naïve individuals stimulated in vitro with the studied recombinant LAIV/SARS-CoV-2 viruses.

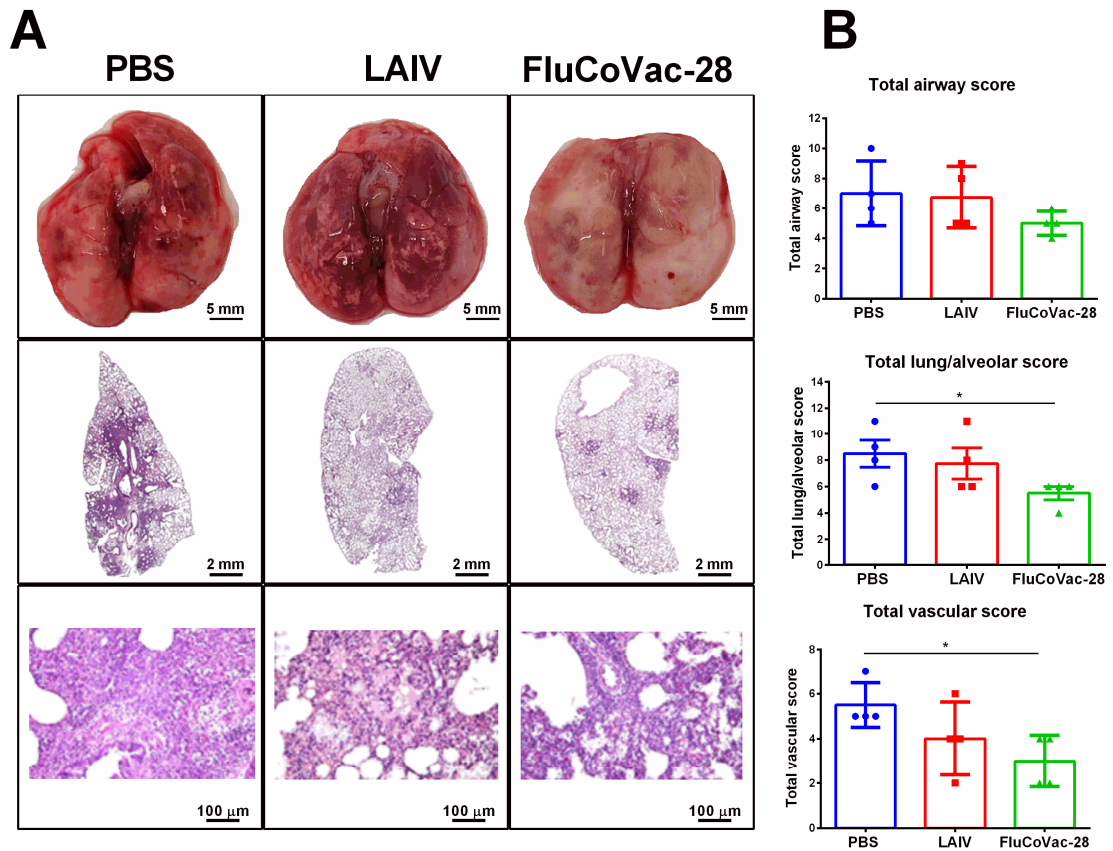

**Figure S13.** Histopathological evaluation of lung tissues of immunized Syrian hamsters on day 5 after challenge with SARS-CoV-2 Wuhan virus. **A.** Representative micrographs of the lungs and lung sections stained with Hematoxylin & Eosin. **B.** Semi-quantitative analyses of the changes in airway, lung/alveolar and vascular systems. Data were analyzed by one-way ANOVA with Tukey's post-hoc multiple analyses test. \*— $p < 0.05$ .



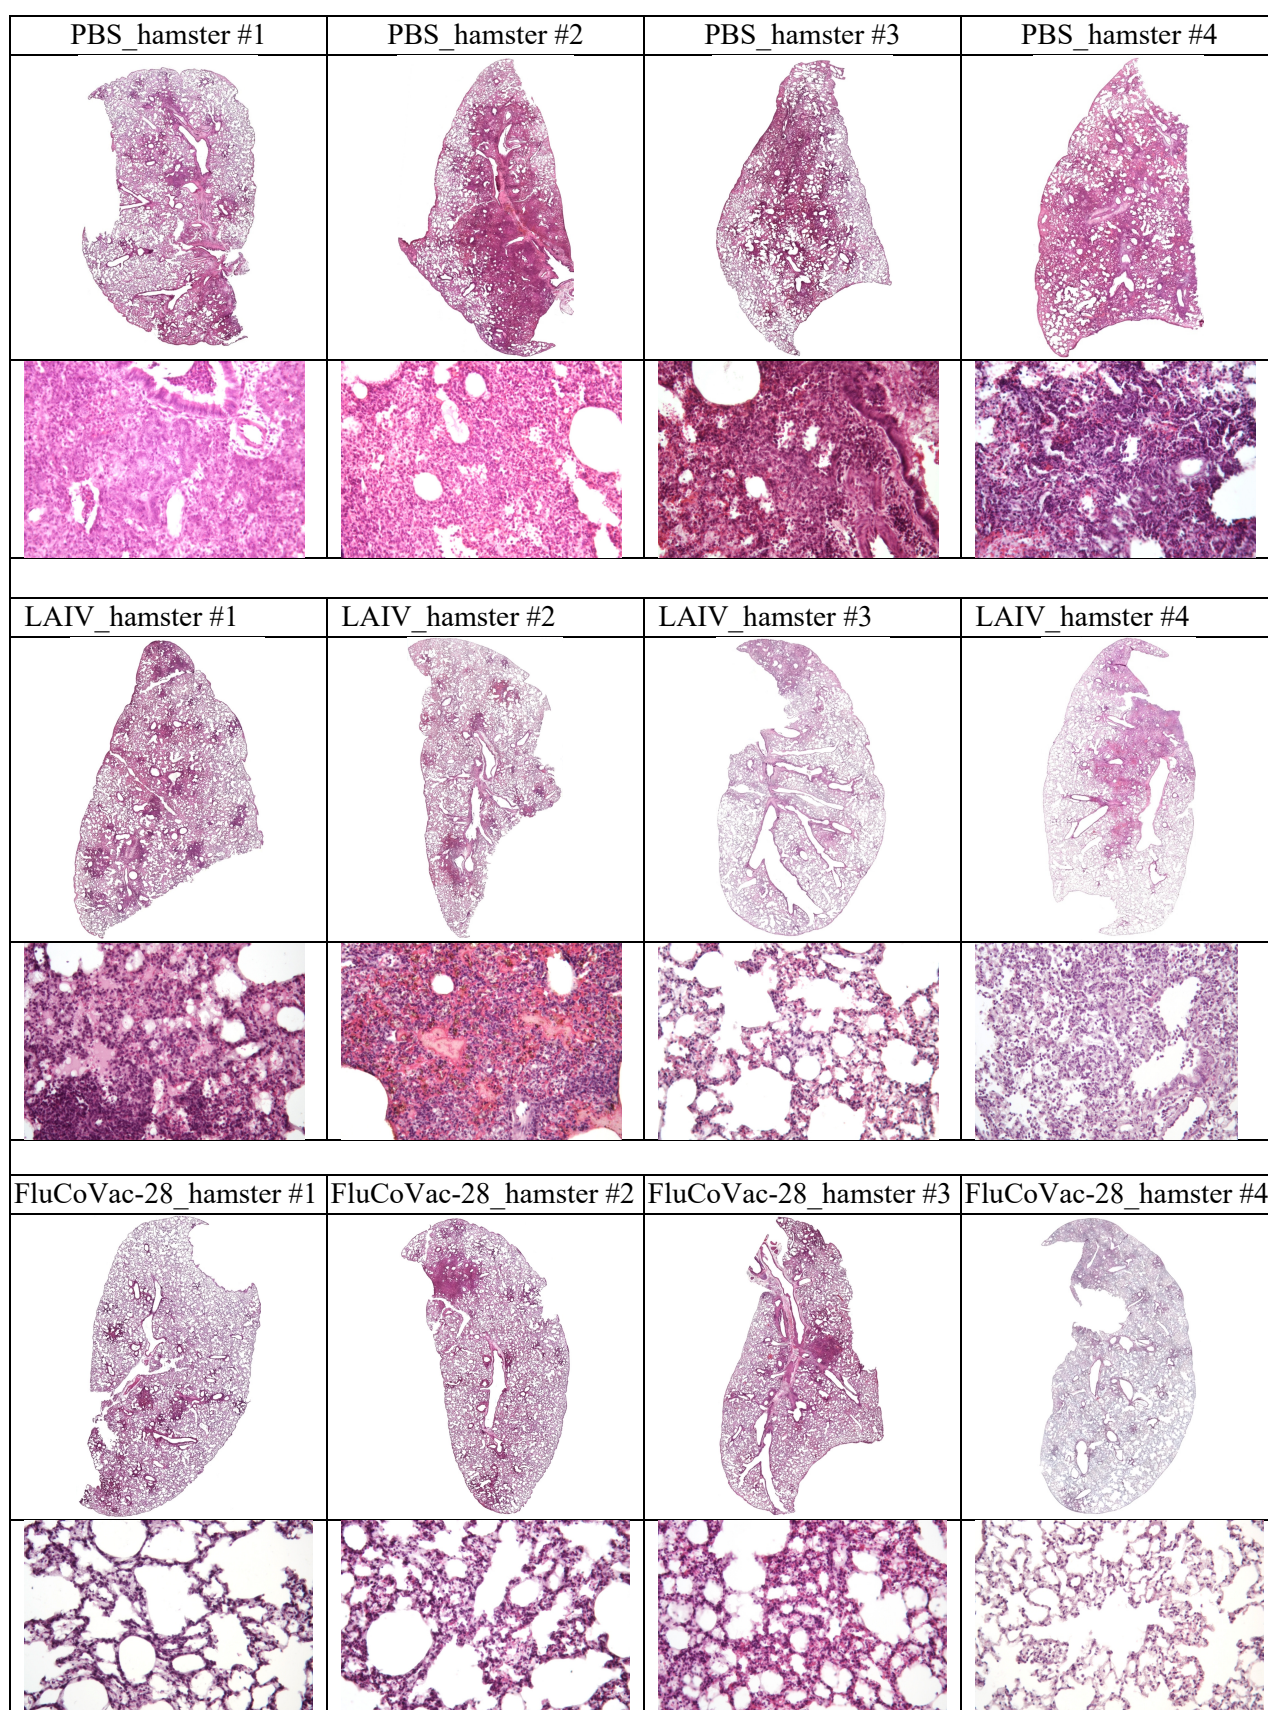

**Figure S14.** Overview of histopathological changes in lung tissues of immunized Syrian hamsters on day 5 after challenge with SARS-CoV-2 Delta variant. Representative micrographs of the lung sections stained with Hematoxylin & Eosin of all four animals in each test group. Lung sections are shown at magnifications of 50× (upper figure) and 200× (lower figure) for each hamster.



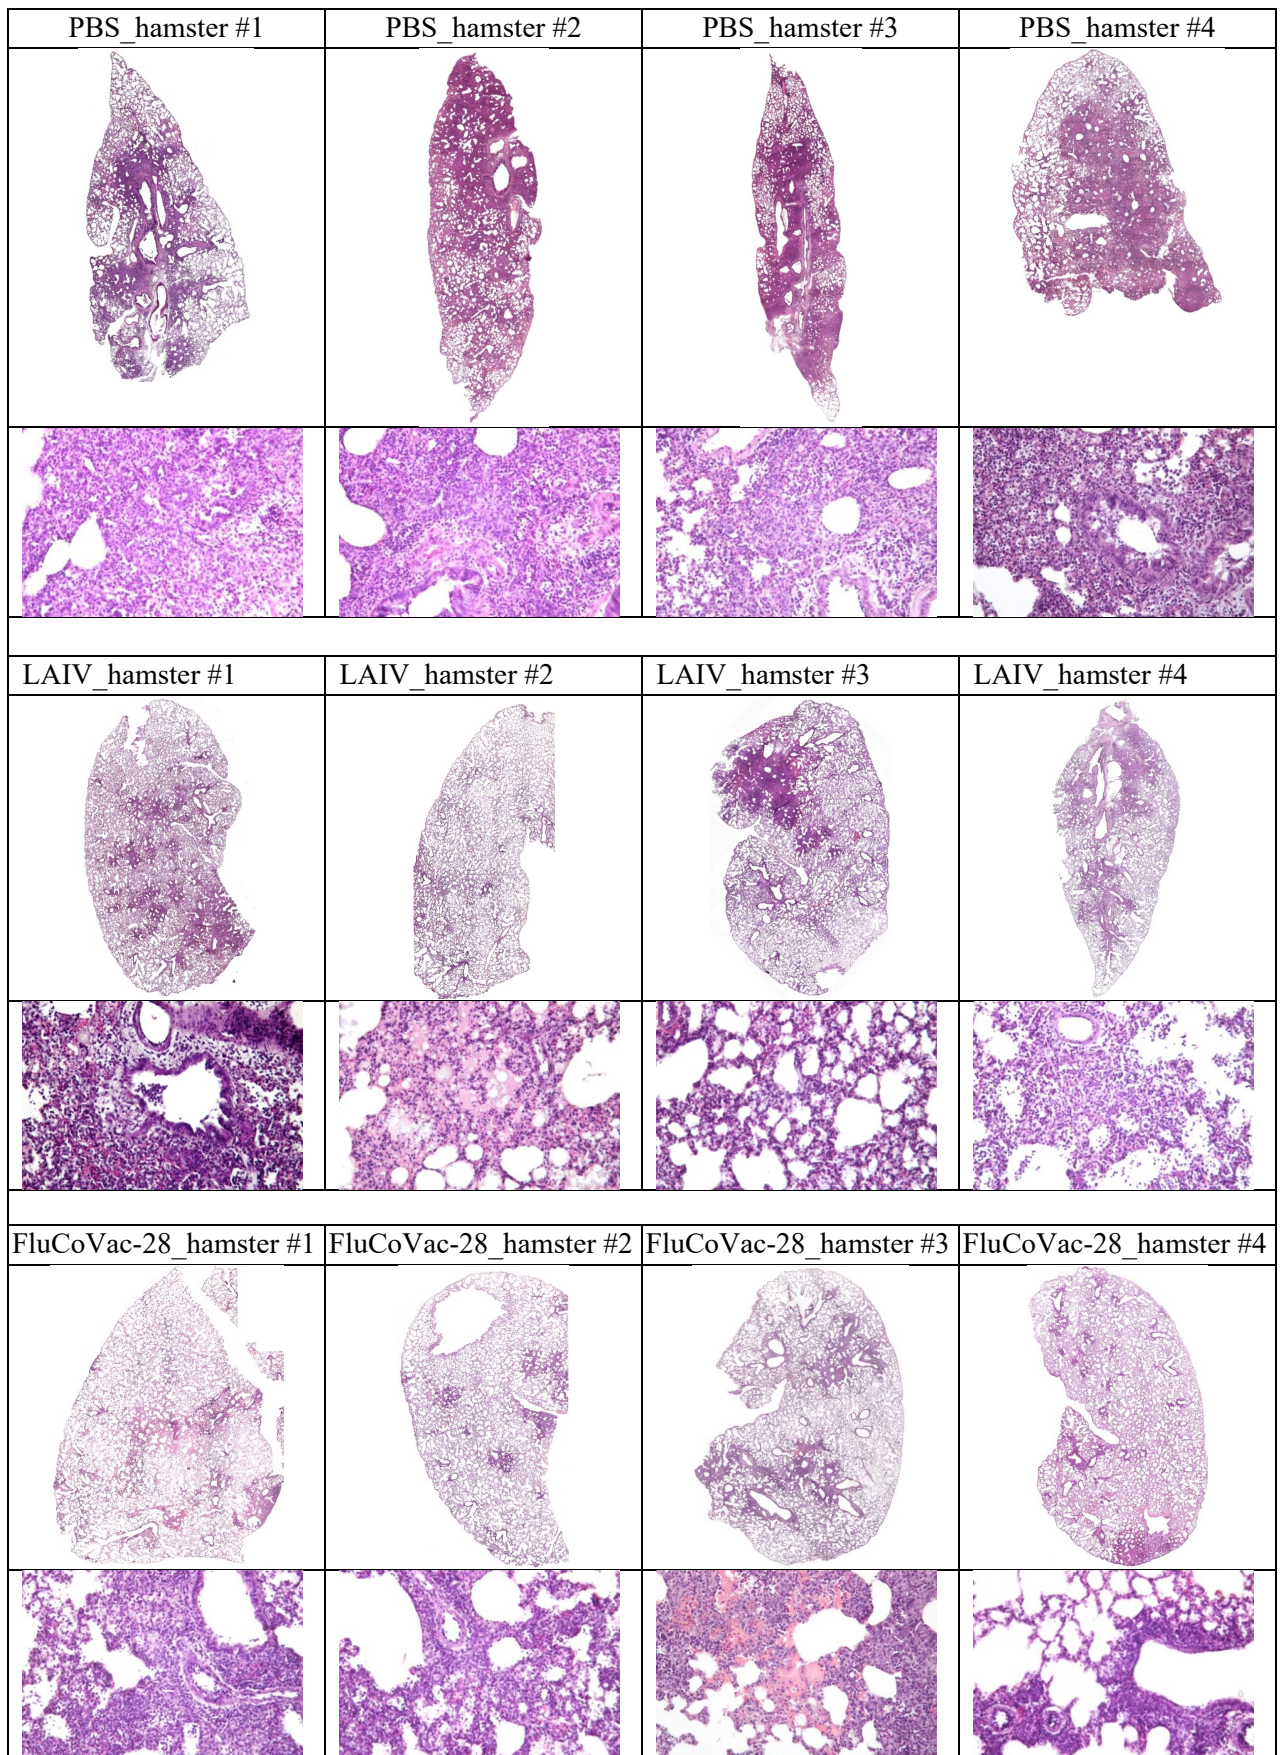

**Figure S15.** Overview of histopathological changes in lung tissues of immunized Syrian hamsters on day 5 after challenge with SARS-CoV-2 Wuhan variant. Representative micrographs of the lung sections stained with Hematoxylin & Eosin of all four animals in each test group. Lung sections are shown at magnifications of 50× (upper figure) and 200× (lower figure) for each hamster.

## References

- Grifoni, A.; Sidney, J.; Zhang, Y.; Scheuermann, R.H.; Peters, B.; Sette, A. A Sequence Homology and Bioinformatic Approach Can Predict Candidate Targets for Immune Responses to SARS-CoV-2. *Cell Host Microbe* **2020**, *27*, 671–680.e2. <https://doi.org/10.1016/j.chom.2020.03.002>.
- Snyder, T.M.; Gittelman, R.M.; Klinger, M.; May, D.H.; Osborne, E.J.; Taniguchi, R.; Zahid, H.J.; Kaplan, I.M.; Dines, J.N.; Noakes, M.T.; et al. Magnitude and Dynamics of the T-Cell Response to SARS-CoV-2 Infection at Both Individual and Population Levels. *medRxiv* **2020**. <https://doi.org/10.1101/2020.07.31.20165647>.
- Mishra, N.; Huang, X.; Joshi, S.; Guo, C.; Ng, J.; Thakkar, R.; Wu, Y.; Dong, X.; Li, Q.; Pinapati, R.S.; et al. Immunoreactive Peptide Maps of SARS-CoV-2. *Commun. Biol.* **2021**, *4*, 225. <https://doi.org/10.1038/s42003-021-01743-9>.
- Saini, S.K.; Hersby, D.S.; Tamhane, T.; Povlsen, H.R.; Amaya Hernandez, S.P.; Nielsen, M.; Gang, A.O.; Hadrup, S.R. SARS-CoV-2 Genome-Wide T Cell Epitope Mapping Reveals Immunodominance and Substantial CD8<sup>+</sup> T Cell Activation in COVID-19 Patients. *Sci. Immunol.* **2021**, *6*, eabf7550. <https://doi.org/10.1126/sciimmunol.abf7550>.
- Tarke, A.; Sidney, J.; Kidd, C.K.; Dan, J.M.; Ramirez, S.I.; Yu, E.D.; Mateus, J.; da Silva Antunes, R.; Moore, E.; Rubiro, P.; et al. Comprehensive Analysis of T Cell Immunodominance and Immunoprevalence of SARS-CoV-2 Epitopes in COVID-19 Cases. *Cell Rep. Med.* **2021**, *2*, 100204. <https://doi.org/10.1016/j.xcrm.2021.100204>.
- Sidney, J.; Botten, J.; Neuman, B.; Buchmeier, M.; Sette, A. Large Scale Analysis of Peptide-HLA Class I Interactions (Direct IEDB Submissions 1000402, 1000425). 2006. Available online: <http://www.iedb.org/reference/1000425> (accessed on 25 February 2020).
- Mahajan, S.; Kode, V.; Bhojak, K.; Karunakaran, C.; Lee, K.; Manoharan, M.; Ramesh, A.; Hv, S.; Srivastava, A.; Sathian, R.; et al. Immunodominant T-Cell Epitopes from the SARS-CoV-2 Spike Antigen Reveal Robust Pre-Existing T-Cell Immunity in Unexposed Individuals. *Sci. Rep.* **2021**, *11*, 13164. <https://doi.org/10.1038/s41598-021-92521-4>.
- Jin, X.; Ding, Y.; Sun, S.; Wang, X.; Zhou, Z.; Liu, X.; Li, M.; Chen, X.; Shen, A.; Wu, Y.; et al. Screening HLA-A-Restricted T Cell Epitopes of SARS-CoV-2 and the Induction of CD8<sup>+</sup> T Cell Responses in HLA-A Transgenic Mice. *Cell. Mol. Immunol.* **2021**, *18*, 2588–2608. <https://doi.org/10.1038/s41423-021-00784-8>.
- Low, J.S.; Vaquerinho, D.; Mele, F.; Foglierini, M.; Jerak, J.; Perotti, M.; Jarrossay, D.; Jovic, S.; Perez, L.; Cacciatore, R.; et al. Clonal Analysis of Immunodominance and Cross-Reactivity of the CD4 T Cell Response to SARS-CoV-2. *Science* **2021**, *372*, 1336–1341. <https://doi.org/10.1126/science.abg8985>.
- Zhang, J.; Xiao, T.; Cai, Y.; Chen, B. Structure of SARS-CoV-2 Spike Protein. *Curr. Opin. Virol.* **2021**, *50*, 173–182. <https://doi.org/10.1016/j.coviro.2021.08.010>.
- Verhagen, J.; van der Meijden, E.D.; Lang, V.; Kremer, A.E.; Völkl, S.; Mackensen, A.; Aigner, M.; Kremer, A.N. Human CD4<sup>+</sup> T Cells Specific for Dominant Epitopes of SARS-CoV-2 Spike and Nucleocapsid Proteins with Therapeutic Potential. *Clin. Exp. Immunol.* **2021**, *205*, 363–378. <https://doi.org/10.1111/cei.13627>.
- Knierman, M.D.; Lannan, M.B.; Spindler, L.J.; McMillian, C.L.; Konrad, R.J.; Siegel, R.W. The Human Leukocyte Antigen Class II Immunopeptidome of the SARS-CoV-2 Spike Glycoprotein. *Cell Rep.* **2020**, *33*, 108454. <https://doi.org/10.1016/j.celrep.2020.108454>.
- Mateus, J.; Grifoni, A.; Tarke, A.; Sidney, J.; Ramirez, S.I.; Dan, J.M.; Burger, Z.C.; Rawlings, S.A.; Smith, D.M.; Phillips, E.; et al. Selective and Cross-Reactive SARS-CoV-2 T Cell Epitopes in Unexposed Humans. *Science* **2020**, *370*, 89–94. <https://doi.org/10.1126/science.abd3871>.
- Loyal, L.; Braun, J.; Henze, L.; Kruse, B.; Dingeldey, M.; Reimer, U.; Kern, F.; Schwarz, T.; Mangold, M.; Unger, C.; et al. Cross-Reactive CD4<sup>+</sup> T Cells Enhance SARS-CoV-2 Immune Responses upon Infection and Vaccination. *Science* **2021**, *374*, eabh1823. <https://doi.org/10.1126/science.abh1823>.
- Prakash, S.; Srivastava, R.; Coulon, P.-G.; Dhanushkodi, N.R.; Chentoufi, A.A.; Tifrea, D.F.; Edwards, R.A.; Figueroa, C.J.; Schubl, S.D.; Hsieh, L.; et al. Genome-Wide B Cell, CD4<sup>+</sup>, and CD8<sup>+</sup> T Cell Epitopes That Are Highly Conserved between Human and Animal Coronaviruses, Identified from SARS-CoV-2 as Targets for Preemptive Pan-Coronavirus Vaccines. *J. Immunol.* **2021**, *206*, 2566–2582. <https://doi.org/10.4049/jimmunol.2001438>.
- Shomuradova, A.S.; Vagida, M.S.; Sheetikov, S.A.; Zornikova, K.V.; Kiryukhin, D.; Titov, A.; Peshkova, I.O.; Khmelevskaya, A.; Dianov, D.V.; Malasheva, M.; et al. SARS-CoV-2 Epitopes Are Recognized by a Public and Diverse Repertoire of Human T Cell Receptors. *Immunity* **2020**, *53*, 1245–1257.e5. <https://doi.org/10.1016/j.immuni.2020.11.004>.
- Wagner, K.I.; Mateyka, L.M.; Jarosch, S.; Grass, V.; Weber, S.; Schober, K.; Hammel, M.; Burrell, T.; Kalali, B.; Poppert, H.; et al. Recruitment of Highly Cytotoxic CD8<sup>+</sup> T Cell Receptors in Mild SARS-CoV-2 Infection. *Cell Rep.* **2022**, *38*, 110214. <https://doi.org/10.1016/j.celrep.2021.110214>.
- Lv, Y.; Ruan, Z.; Wang, L.; Ni, B.; Wu, Y. Identification of a Novel Conserved HLA-A\*0201-Restricted Epitope from the Spike Protein of SARS-CoV. *BMC Immunol.* **2009**, *10*, 61. <https://doi.org/10.1186/1471-2172-10-61>.
- Woldemeskel, B.A.; Garliss, C.C.; Blankson, J.N. SARS-CoV-2 mRNA Vaccines Induce Broad CD4<sup>+</sup> T Cell Responses That Recognize SARS-CoV-2 Variants and HCoV-NL63. *J. Clin. Invest.* **2021**, *131*, 149335. <https://doi.org/10.1172/JCI149335>.
- Liu, R.; Jiang, W.; Mellins, E.D. Yeast Display of MHC-II Enables Rapid Identification of Peptide Ligands from Protein Antigens (RIPPA). *Cell. Mol. Immunol.* **2021**, *18*, 1847–1860. <https://doi.org/10.1038/s41423-021-00717-5>.
- Schwarz, T.; Heiss, K.; Mahendran, Y.; Casilag, F.; Kurth, F.; Sander, L.E.; Wendtner, C.-M.; Hoechstetter, M.A.; Müller, M.A.; Sekul, R.; et al. SARS-CoV-2 Proteome-Wide Analysis Revealed Significant Epitope Signatures in COVID-19 Patients. *Front. Immunol.* **2021**, *12*, 629185. <https://doi.org/10.3389/fimmu.2021.629185>.



22. Hu, W.; He, M.; Wang, X.; Sun, Q.; Kuang, M. Specific CD8<sup>+</sup> TCR Repertoire Recognizing Conserved Antigens of SARS-CoV-2 in Unexposed Population: A Prerequisite for Broad-Spectrum CD8<sup>+</sup> T Cell Immunity. *Vaccines* **2021**, *9*, 1093. <https://doi.org/10.3390/vaccines9101093>.
23. Quiros-Fernandez, I.; Poorebrahim, M.; Fakhr, E.; Cid-Arregui, A. Immunogenic T Cell Epitopes of SARS-CoV-2 Are Recognized by Circulating Memory and Naïve CD8 T Cells of Unexposed Individuals. *EBioMedicine* **2021**, *72*, 103610. <https://doi.org/10.1016/j.ebiom.2021.103610>.
24. Nathan, A.; Rossin, E.J.; Kaseke, C.; Park, R.J.; Khatri, A.; Koundakjian, D.; Urbach, J.M.; Singh, N.K.; Bashirova, A.; Tano-Menka, R.; et al. Structure-Guided T Cell Vaccine Design for SARS-CoV-2 Variants and Sarbecoviruses. *Cell* **2021**, *184*, 4401–4413.e10. <https://doi.org/10.1016/j.cell.2021.06.029>.
25. Wang, B.; Chen, H.; Jiang, X.; Zhang, M.; Wan, T.; Li, N.; Zhou, X.; Wu, Y.; Yang, F.; Yu, Y.; et al. Identification of an HLA-A\*0201-Restricted CD8<sup>+</sup> T-Cell Epitope SSp-1 of SARS-CoV Spike Protein. *Blood* **2004**, *104*, 200–206. <https://doi.org/10.1182/blood-2003-11-4072>.
26. Tsao, Y.-P.; Lin, J.-Y.; Jan, J.-T.; Leng, C.-H.; Chu, C.-C.; Yang, Y.-C.; Chen, S.-L. HLA-A\*0201 T-Cell Epitopes in Severe Acute Respiratory Syndrome (SARS) Coronavirus Nucleocapsid and Spike Proteins. *Biochem. Biophys. Res. Commun.* **2006**, *344*, 63–71. <https://doi.org/10.1016/j.bbrc.2006.03.152>.
27. Deng, J.; Pan, J.; Qiu, M.; Mao, L.; Wang, Z.; Zhu, G.; Gao, L.; Su, J.; Hu, Y.; Luo, O.J.; et al. Identification of HLA-A2 Restricted CD8<sup>+</sup> T Cell Epitopes in SARS-CoV-2 Structural Proteins. *J. Leukoc. Biol.* **2021**, *110*, 1171–1180. <https://doi.org/10.1002/JLB.4MA0621-020R>.
28. Nielsen, S.S.; Vibholm, L.K.; Monrad, I.; Olesen, R.; Frattari, G.S.; Pahus, M.H.; Højen, J.F.; Gunst, J.D.; Erikstrup, C.; Holleufer, A.; et al. SARS-CoV-2 Elicits Robust Adaptive Immune Responses Regardless of Disease Severity. *EBioMedicine* **2021**, *68*, 103410. <https://doi.org/10.1016/j.ebiom.2021.103410>.
29. Habel, J.R.; Nguyen, T.H.O.; van de Sandt, C.E.; Juno, J.A.; Chaurasia, P.; Wragg, K.; Koutsakos, M.; Hensen, L.; Jia, X.; Chua, B.; et al. Suboptimal SARS-CoV-2-Specific CD8<sup>+</sup> T Cell Response Associated with the Prominent HLA-A\*02:01 Phenotype. *Proc. Natl. Acad. Sci. USA* **2020**, *117*, 24384–24391. <https://doi.org/10.1073/pnas.2015486117>.
30. Hu, C.; Shen, M.; Han, X.; Chen, Q.; Li, L.; Chen, S.; Zhang, J.; Gao, F.; Wang, W.; Wang, Y.; et al. Identification of Cross-Reactive CD8<sup>+</sup> T Cell Receptors with High Functional Avidity to a SARS-CoV-2 Immunodominant Epitope and Its Natural Mutant Variants. *Genes Dis.* **2022**, *9*, 216–229. <https://doi.org/10.1016/j.gendis.2021.05.006>.
31. Pan, K.; Chiu, Y.; Huang, E.; Chen, M.; Wang, J.; Lai, I.; Singh, S.; Shaw, R.M.; MacCoss, M.J.; Yee, C. Mass Spectrometric Identification of Immunogenic SARS-CoV-2 Epitopes and Cognate TCRs. *Proc. Natl. Acad. Sci. USA* **2021**, *118*, e2111815118. <https://doi.org/10.1073/pnas.2111815118>.
32. Ishizuka, J.; Grebe, K.; Shenderov, E.; Peters, B.; Chen, Q.; Peng, Y.; Wang, L.; Dong, T.; Pasquetto, V.; Oseroff, C.; et al. Quantitating T Cell Cross-Reactivity for Unrelated Peptide Antigens. *J. Immunol.* **2009**, *183*, 4337–4345. <https://doi.org/10.4049/jimmunol.0901607>.
33. Minervina, A.A.; Pogorelyy, M.V.; Kirk, A.M.; Crawford, J.C.; Allen, E.K.; Chou, C.-H.; Mettelman, R.C.; Allison, K.J.; Lin, C.-Y.; Brice, D.C.; et al. SARS-CoV-2 Antigen Exposure History Shapes Phenotypes and Specificity of Memory CD8 T Cells. *medRxiv* **2022**, *23*, 781–790. <https://doi.org/10.1101/2021.07.12.21260227>.
34. Li, M.; Liu, J.; Lu, R.; Zhang, Y.; Du, M.; Xing, M.; Wu, Z.; Kong, X.; Zhu, Y.; Zhou, X.; et al. Longitudinal Immune Profiling Reveals Dominant Epitopes Mediating Long-Term Humoral Immunity in COVID-19-Convalescent Individuals. *J. Allergy Clin. Immunol.* **2022**, *149*, 1225–1241. <https://doi.org/10.1016/j.jaci.2022.01.005>.
35. Oberhardt, V.; Luxenburger, H.; Kemming, J.; Schulien, I.; Ciminski, K.; Giese, S.; Csernalabics, B.; Lang-Meli, J.; Janowska, I.; Staniek, J.; et al. Rapid and Stable Mobilization of CD8<sup>+</sup> T Cells by SARS-CoV-2 mRNA Vaccine. *Nature* **2021**, *597*, 268–273. <https://doi.org/10.1038/s41586-021-03841-4>.
36. Zhou, M.; Xu, D.; Li, X.; Li, H.; Shan, M.; Tang, J.; Wang, M.; Wang, F.-S.; Zhu, X.; Tao, H.; et al. Screening and Identification of Severe Acute Respiratory Syndrome-Associated Coronavirus-Specific CTL Epitopes. *J. Immunol.* **2006**, *177*, 2138–2145. <https://doi.org/10.4049/jimmunol.177.4.2138>.
37. Chen, H.; Hou, J.; Jiang, X.; Ma, S.; Meng, M.; Wang, B.; Zhang, M.; Zhang, M.; Tang, X.; Zhang, F.; et al. Response of Memory CD8<sup>+</sup> T Cells to Severe Acute Respiratory Syndrome (SARS) Coronavirus in Recovered SARS Patients and Healthy Individuals. *J. Immunol.* **2005**, *175*, 591–598. <https://doi.org/10.4049/jimmunol.175.1.591>.
38. Wang, Y.-D.; Sin, W.-Y.F.; Xu, G.-B.; Yang, H.-H.; Wong, T.; Pang, X.-W.; He, X.-Y.; Zhang, H.-G.; Ng, J.N.L.; Cheng, C.-S.S.; et al. T-Cell Epitopes in Severe Acute Respiratory Syndrome (SARS) Coronavirus Spike Protein Elicit a Specific T-Cell Immune Response in Patients Who Recover from SARS. *J. Virol.* **2004**, *78*, 5612–5618. <https://doi.org/10.1128/JVI.78.11.5612-5618.2004>.
39. Meyers, L.M.; Gutiérrez, A.H.; Boyle, C.M.; Terry, F.; McGonnigal, B.G.; Salazar, A.; Princiotta, M.F.; Martin, W.D.; De Groot, A.S.; Moise, L. Highly Conserved, Non-Human-like, and Cross-Reactive SARS-CoV-2 T Cell Epitopes for COVID-19 Vaccine Design and Validation. *NPJ Vaccines* **2021**, *6*, 71. <https://doi.org/10.1038/s41541-021-00331-6>.
40. Sidney, J.; Botten, J.; Neuman, B.; Buchmeier, M.; Sette, A. HLA DRB1\*01:01 Binding Capacity of Selected SARS-Derived Peptides. 2006. Available online: <http://www.iedb.org/reference/1000399> (accessed on 25 February 2020).
41. Poran, A.; Harjanto, D.; Malloy, M.; Arieta, C.M.; Rothenberg, D.A.; Lenkala, D.; van Buuren, M.M.; Addona, T.A.; Rooney, M.S.; Srinivasan, L.; et al. Sequence-Based Prediction of SARS-CoV-2 Vaccine Targets Using a Mass Spectrometry-Based Bioinformatics Predictor Identifies Immunogenic T Cell Epitopes. *Genome Med.* **2020**, *12*, 70. <https://doi.org/10.1186/s13073-020-00767-w>.

42. Wu, D.; Kolesnikov, A.; Yin, R.; Guest, J.D.; Gowthaman, R.; Shmelev, A.; Serdyuk, Y.; Dianov, D.V.; Efimov, G.A.; Pierce, B.G.; et al. Structural Assessment of HLA-A2-Restricted SARS-CoV-2 Spike Epitopes Recognized by Public and Private T-Cell Receptors. *Nat. Commun.* **2022**, *13*, 19. <https://doi.org/10.1038/s41467-021-27669-8>.
43. Kared, H.; Redd, A.D.; Bloch, E.M.; Bonny, T.S.; Sumatoh, H.; Kairi, F.; Carbajo, D.; Abel, B.; Newell, E.W.; Bettinotti, M.P.; et al. SARS-CoV-2-Specific CD8<sup>+</sup> T Cell Responses in Convalescent COVID-19 Individuals. *J. Clin. Invest.* **2021**, *131*, 145476. <https://doi.org/10.1172/JCI145476>.
44. Poluektov, Y.; George, M.; Daftarian, P.; Delcommenne, M.C. Assessment of SARS-CoV-2 Specific CD4(+) and CD8 (+) T Cell Responses Using MHC Class I and II Tetramers. *Vaccine* **2021**, *39*, 2110–2116. <https://doi.org/10.1016/j.vaccine.2021.03.008>.
45. Prachar, M.; Justesen, S.; Steen-Jensen, D.B.; Thorgrimsen, S.; Jurgons, E.; Winther, O.; Bagger, F.O. Identification and Validation of 174 COVID-19 Vaccine Candidate Epitopes Reveals Low Performance of Common Epitope Prediction Tools. *Sci. Rep.* **2020**, *10*, 20465. <https://doi.org/10.1038/s41598-020-77466-4>.
46. Gangaev, A.; Ketelaars, S.L.C.; Isaeva, O.I.; Patiwaal, S.; Dopler, A.; Hoefakker, K.; De Biasi, S.; Gibellini, L.; Mussini, C.; Guaraldi, G.; et al. Identification and Characterization of a SARS-CoV-2 Specific CD8<sup>+</sup> T Cell Response with Immunodominant Features. *Nat. Commun.* **2021**, *12*, 2593. <https://doi.org/10.1038/s41467-021-22811-y>.
47. Agerer, B.; Koblishcke, M.; Gudipati, V.; Montaña-Gutierrez, L.F.; Smyth, M.; Popa, A.; Genger, J.-W.; Endler, L.; Florian, D.M.; Mühlgraber, V.; et al. SARS-CoV-2 Mutations in MHC-I-Restricted Epitopes Evade CD8<sup>+</sup> T Cell Responses. *Sci. Immunol.* **2021**, *6*, eabg6461. <https://doi.org/10.1126/sciimmunol.abg6461>.
48. Weingarten-Gabbay, S.; Klaeger, S.; Sarkizova, S.; Pearlman, L.R.; Chen, D.-Y.; Gallagher, K.M.E.; Bauer, M.R.; Taylor, H.B.; Dunn, W.A.; Tarr, C.; et al. Profiling SARS-CoV-2 HLA-I Peptidome Reveals T Cell Epitopes from out-of-Frame ORFs. *Cell* **2021**, *184*, 3962–3980.e17. <https://doi.org/10.1016/j.cell.2021.05.046>.
49. Shimizu, K.; Iyoda, T.; Sanpei, A.; Nakazato, H.; Okada, M.; Ueda, S.; Kato-Murayama, M.; Murayama, K.; Shirouzu, M.; Harada, N.; et al. Identification of TCR Repertoires in Functionally Competent Cytotoxic T Cells Cross-Reactive to SARS-CoV-2. *Commun. Biol.* **2021**, *4*, 1365. <https://doi.org/10.1038/s42003-021-02885-6>.
50. Peng, Y.; Mentzer, A.J.; Liu, G.; Yao, X.; Yin, Z.; Dong, D.; Dejnirattisai, W.; Rostron, T.; Supasa, P.; Liu, C.; et al. Broad and Strong Memory CD4<sup>+</sup> and CD8<sup>+</sup> T Cells Induced by SARS-CoV-2 in UK Convalescent Individuals Following COVID-19. *Nat. Immunol.* **2020**, *21*, 1336–1345. <https://doi.org/10.1038/s41590-020-0782-6>.
51. Schulien, I.; Kemming, J.; Oberhardt, V.; Wild, K.; Seidel, L.M.; Killmer, S.; Sugar, Daul, F.; Lago, M.S.; Decker, A.; et al. Characterization of Pre-Existing and Induced SARS-CoV-2-Specific CD8<sup>+</sup> T Cells. *Nat. Med.* **2021**, *27*, 78–85. <https://doi.org/10.1038/s41591-020-01143-2>.
52. Bilich, T.; Nelde, A.; Heitmann, J.S.; Maringer, Y.; Roerden, M.; Bauer, J.; Rieth, J.; Wacker, M.; Peter, A.; Hörber, S.; et al. T Cell and Antibody Kinetics Delineate SARS-CoV-2 Peptides Mediating Long-Term Immune Responses in COVID-19 Convalescent Individuals. *Sci. Transl. Med.* **2021**, *13*, eabf7517. <https://doi.org/10.1126/scitranslmed.abf7517>.
53. Ferretti, A.P.; Kula, T.; Wang, Y.; Nguyen, D.M.V.; Weinheimer, A.; Dunlap, G.S.; Xu, Q.; Nabils, N.; Perullo, C.R.; Cristofaro, A.W.; et al. Unbiased Screens Show CD8<sup>+</sup> T Cells of COVID-19 Patients Recognize Shared Epitopes in SARS-CoV-2 That Largely Reside Outside the Spike Protein. *Immunity* **2020**, *53*, 1095–1107.e3. <https://doi.org/10.1016/j.immuni.2020.10.006>.
54. Rowntree, L.C.; Petersen, J.; Juno, J.A.; Chaurasia, P.; Wragg, K.; Koutsakos, M.; Hensen, L.; Wheatley, A.K.; Kent, S.J.; Rossjohn, J.; et al. SARS-CoV-2-Specific CD8<sup>+</sup> T-Cell Responses and TCR Signatures in the Context of a Prominent HLA-A\*24:02 Allomorph. *Immunol. Cell Biol.* **2021**, *99*, 990–1000. <https://doi.org/10.1111/imcb.12482>.
55. Zhang, H.; Deng, S.; Ren, L.; Zheng, P.; Hu, X.; Jin, T.; Tan, X. Profiling CD8<sup>+</sup> T Cell Epitopes of COVID-19 Convalescents Reveals Reduced Cellular Immune Responses to SARS-CoV-2 Variants. *Cell Rep.* **2021**, *36*, 109708. <https://doi.org/10.1016/j.celrep.2021.109708>.
56. Nguyen, T.H.O.; Rowntree, L.C.; Petersen, J.; Chua, B.Y.; Hensen, L.; Kedzierski, L.; van de Sandt, C.E.; Chaurasia, P.; Tan, H.-X.; Habel, J.R.; et al. CD8<sup>+</sup> T Cells Specific for an Immunodominant SARS-CoV-2 Nucleocapsid Epitope Display High Naive Precursor Frequency and TCR Promiscuity. *Immunity* **2021**, *54*, 1066–1082.e5. <https://doi.org/10.1016/j.immuni.2021.04.009>.
57. Nelde, A.; Bilich, T.; Heitmann, J.S.; Maringer, Y.; Salih, H.R.; Roerden, M.; Lübke, M.; Bauer, J.; Rieth, J.; Wacker, M.; et al. SARS-CoV-2-Derived Peptides Define Heterologous and COVID-19-Induced T Cell Recognition. *Nat. Immunol.* **2021**, *22*, 74–85. <https://doi.org/10.1038/s41590-020-00808-x>.
58. Zhao, J.; Wang, L.; Schank, M.; Dang, X.; Lu, Z.; Cao, D.; Khanal, S.; Nguyen, L.N.; Nguyen, L.N.T.; Zhang, J.; et al. SARS-CoV-2 Specific Memory T Cell Epitopes Identified in COVID-19-Recovered Subjects. *Virus Res.* **2021**, *304*, 198508. <https://doi.org/10.1016/j.virusres.2021.198508>.
59. Wang, Y.-D.; Chen, W.F. Detecting Specific Cytotoxic T Lymphocytes against SARS-Coronavirus with DimerX HLA-A2:Ig Fusion Protein. *Clin. Immunol.* **2004**, *113*, 151–154. <https://doi.org/10.1016/j.clim.2004.07.004>.
60. Kohyama, S.; Ohno, S.; Suda, T.; Taneichi, M.; Yokoyama, S.; Mori, M.; Kobayashi, A.; Hayashi, H.; Uchida, T.; Matsui, M. Efficient Induction of Cytotoxic T Lymphocytes Specific for Severe Acute Respiratory Syndrome (SARS)-Associated Coronavirus by Immunization with Surface-Linked Liposomal Peptides Derived from a Non-Structural Polyprotein 1a. *Antivir. Res.* **2009**, *84*, 168–177. <https://doi.org/10.1016/j.antiviral.2009.09.004>.
61. Rha, M.-S.; Jeong, H.W.; Ko, J.-H.; Choi, S.J.; Seo, I.-H.; Lee, J.S.; Sa, M.; Kim, A.R.; Joo, E.-J.; Ahn, J.Y.; et al. PD-1-Expressing SARS-CoV-2-Specific CD8<sup>+</sup> T Cells Are Not Exhausted, but Functional in Patients with COVID-19. *Immunity* **2021**, *54*, 44–52.e3. <https://doi.org/10.1016/j.immuni.2020.12.002>.

62. de Castro, M.V.; Santos, K.S.; Apostolico, J.S.; Fernandes, E.R.; Almeida, R.R.; Levin, G.; Magawa, J.Y.; Nunes, J.P.S.; Bruni, M.; Yamamoto, M.M.; et al. Recurrence of COVID-19 Associated with Reduced T-Cell Responses in a Monozygotic Twin Pair. *Open Biol.* **2022**, *12*, 210240. <https://doi.org/10.1098/rsob.210240>.
63. Zhao, J.; Zhao, J.; Mangalam, A.K.; Channappanavar, R.; Fett, C.; Meyerholz, D.K.; Agnihothram, S.; Baric, R.S.; David, C.S.; Perlman, S. Airway Memory CD4<sup>+</sup> T Cells Mediate Protective Immunity against Emerging Respiratory Coronaviruses. *Immunity* **2016**, *44*, 1379–1391. <https://doi.org/10.1016/j.immuni.2016.05.006>.
64. Kang, S.; Yang, M.; Hong, Z.; Zhang, L.; Huang, Z.; Chen, X.; He, S.; Zhou, Z.; Zhou, Z.; Chen, Q.; et al. Crystal Structure of SARS-CoV-2 Nucleocapsid Protein RNA Binding Domain Reveals Potential Unique Drug Targeting Sites. *Acta Pharm. Sin. B* **2020**, *10*, 1228–1238. <https://doi.org/10.1016/j.apsb.2020.04.009>.
65. Heide, J.; Schulte, S.; Kohsar, M.; Brehm, T.T.; Herrmann, M.; Karsten, H.; Marget, M.; Peine, S.; Johansson, A.M.; Sette, A.; et al. Broadly Directed SARS-CoV-2-Specific CD4<sup>+</sup> T Cell Response Includes Frequently Detected Peptide Specificities within the Membrane and Nucleoprotein in Patients with Acute and Resolved COVID-19. *PLoS Pathog.* **2021**, *17*, e1009842. <https://doi.org/10.1371/journal.ppat.1009842>.
66. Lineburg, K.E.; Grant, E.J.; Swaminathan, S.; Chatzileontiadou, D.S.M.; Szeto, C.; Sloane, H.; Panikkar, A.; Raju, J.; Crooks, P.; Rehan, S.; et al. CD8<sup>+</sup> T Cells Specific for an Immunodominant SARS-CoV-2 Nucleocapsid Epitope Cross-React with Selective Seasonal Coronaviruses. *Immunity* **2021**, *54*, 1055–1065.e5. <https://doi.org/10.1016/j.immuni.2021.04.006>.
67. Panikkar, A.; Lineburg, K.E.; Raju, J.; Chew, K.Y.; Ambalathingal, G.R.; Rehan, S.; Swaminathan, S.; Crooks, P.; Le Texier, L.; Beagley, L.; et al. SARS-CoV-2-Specific T Cells Generated for Adoptive Immunotherapy Are Capable of Recognizing Multiple SARS-CoV-2 Variants. *PLoS Pathog.* **2022**, *18*, e1010339. <https://doi.org/10.1371/journal.ppat.1010339>.
68. Swaminathan, S.; Lineburg, K.E.; Ambalathingal, G.R.; Crooks, P.; Grant, E.J.; Mohan, S.V.; Raju, J.; Panikkar, A.; Le Texier, L.; Tong, Z.W.M.; et al. Limited Recognition of Highly Conserved Regions of SARS-CoV-2. *Microbiol. Spectr.* **2022**, *10*, e0278021. <https://doi.org/10.1128/spectrum.02780-21>.
69. Piadel, K.; Haybatollahi, A.; Dalgleish, A.G.; Smith, P.L. Selection and T-Cell Antigenicity of Synthetic Long Peptides Derived from SARS-CoV-2. *J. Gen. Virol.* **2022**, *103*, 1698. <https://doi.org/10.1099/jgv.0.001698>.
70. Le Bert, N.; Tan, A.T.; Kunasegaran, K.; Tham, C.Y.L.; Hafezi, M.; Chia, A.; Chng, M.H.Y.; Lin, M.; Tan, N.; Linster, M.; et al. SARS-CoV-2-Specific T Cell Immunity in Cases of COVID-19 and SARS, and Uninfected Controls. *Nature* **2020**, *584*, 457–462. <https://doi.org/10.1038/s41586-020-2550-z>.
71. Schmidt, K.G.; Nganou-Makamdop, K.; Tenbusch, M.; El Kenz, B.; Maier, C.; Lapuente, D.; Überla, K.; Spriewald, B.; Bergmann, S.; Harrer, E.G.; et al. SARS-CoV-2-Seronegative Subjects Target CTL Epitopes in the SARS-CoV-2 Nucleoprotein Cross-Reactive to Common Cold Coronaviruses. *Front. Immunol.* **2021**, *12*, 627568. <https://doi.org/10.3389/fimmu.2021.627568>.
72. Sekine, T.; Perez-Potti, A.; Rivera-Ballesteros, O.; Strålin, K.; Gorin, J.-B.; Olsson, A.; Llewellyn-Lacey, S.; Kamal, H.; Bogdanovic, G.; Muschiol, S.; et al. Robust T Cell Immunity in Convalescent Individuals with Asymptomatic or Mild COVID-19. *Cell* **2020**, *183*, 158–168.e14. <https://doi.org/10.1016/j.cell.2020.08.017>.
73. Rammensee, H.-G.; Gouttefangeas, C.; Heidt, S.; Klein, R.; Preuß, B.; Walz, J.S.; Nelde, A.; Haen, S.P.; Reth, M.; Yang, J.; et al. Designing a SARS-CoV-2 T-Cell-Inducing Vaccine for High-Risk Patient Groups. *Vaccines* **2021**, *9*, 428. <https://doi.org/10.3390/vaccines9050428>.
74. Lee, E.; Sandgren, K.; Duette, G.; Stylianou, V.V.; Khanna, R.; Eden, J.-S.; Blyth, E.; Gottlieb, D.; Cunningham, A.L.; Palmer, S. Identification of SARS-CoV-2 Nucleocapsid and Spike T-Cell Epitopes for Assessing T-Cell Immunity. *J. Virol.* **2021**, *95*, e02002-20. <https://doi.org/10.1128/JVI.02002-20>.
75. Nagler, A.; Kalaora, S.; Barbolin, C.; Gangaev, A.; Ketelaars, S.L.C.; Alon, M.; Pai, J.; Benedek, G.; Yahalom-Ronen, Y.; Erez, N.; et al. Identification of Presented SARS-CoV-2 HLA Class I and HLA Class II Peptides Using HLA Peptidomics. *Cell Rep.* **2021**, *35*, 109305. <https://doi.org/10.1016/j.celrep.2021.109305>.
76. Cheung, Y.K.; Cheng, S.C.S.; Sin, F.W.Y.; Chan, K.T.; Xie, Y. Investigation of Immunogenic T-Cell Epitopes in SARS Virus Nucleocapsid Protein and Their Role in the Prevention and Treatment of SARS Infection. *Hong Kong Med. J.* **2008**, *14* (Suppl. 4), 27–30.
77. Cheung, Y.-K.; Cheng, S.C.-S.; Sin, F.W.-Y.; Chan, K.-T.; Xie, Y. Induction of T-Cell Response by a DNA Vaccine Encoding a Novel HLA-A\*0201 Severe Acute Respiratory Syndrome Coronavirus Epitope. *Vaccine* **2007**, *25*, 6070–6077. <https://doi.org/10.1016/j.vaccine.2007.05.025>.
78. Szeto, C.; Chatzileontiadou, D.S.M.; Nguyen, A.T.; Sloane, H.; Lobos, C.A.; Jayasinghe, D.; Halim, H.; Smith, C.; Riboldi-Tunncliffe, A.; Grant, E.J.; et al. The Presentation of SARS-CoV-2 Peptides by the Common HLA-A\* 02:01 Molecule. *iScience* **2021**, *24*, 102096. <https://doi.org/10.1016/j.isci.2021.102096>.
79. Voss, C.; Esmail, S.; Liu, X.; Knauer, M.J.; Ackloo, S.; Kaneko, T.; Lowes, L.; Stogios, P.; Seitova, A.; Hutchinson, A.; et al. Epitope-Specific Antibody Responses Differentiate COVID-19 Outcomes and Variants of Concern. *JCI Insight* **2021**, *6*, 148855. <https://doi.org/10.1172/jci.insight.148855>.
80. Musicò, A.; Frigerio, R.; Mussida, A.; Barzon, L.; Sinigaglia, A.; Riccetti, S.; Gobbi, F.; Piubelli, C.; Bergamaschi, G.; Chiari, M.; et al. SARS-CoV-2 Epitope Mapping on Microarrays Highlights Strong Immune-Response to N Protein Region. *Vaccines* **2021**, *9*, 35. <https://doi.org/10.3390/vaccines9010035>.
81. Heffron, A.S.; McIlwain, S.J.; Amjadi, M.F.; Baker, D.A.; Khullar, S.; Armbrust, T.; Halfmann, P.J.; Kawaoka, Y.; Sethi, A.K.; Palmenberg, A.C.; et al. The Landscape of Antibody Binding in SARS-CoV-2 Infection. *PLoS Biol.* **2021**, *19*, e3001265. <https://doi.org/10.1371/journal.pbio.3001265>.

82. Yang, M.; He, S.; Chen, X.; Huang, Z.; Zhou, Z.; Zhou, Z.; Chen, Q.; Chen, S.; Kang, S. Structural Insight Into the SARS-CoV-2 Nucleocapsid Protein C-Terminal Domain Reveals a Novel Recognition Mechanism for Viral Transcriptional Regulatory Sequences. *Front. Chem.* **2021**, *8*, 624765. <https://doi.org/10.3389/fchem.2020.624765>.
83. Ohno, S.; Kohyama, S.; Taneichi, M.; Moriya, O.; Hayashi, H.; Oda, H.; Mori, M.; Kobayashi, A.; Akatsuka, T.; Uchida, T.; et al. Synthetic Peptides Coupled to the Surface of Liposomes Effectively Induce SARS Coronavirus-Specific Cytotoxic T Lymphocytes and Viral Clearance in HLA-A\*0201 Transgenic Mice. *Vaccine* **2009**, *27*, 3912–3920. <https://doi.org/10.1016/j.vaccine.2009.04.001>.
84. Holenya, P.; Lange, P.J.; Reimer, U.; Woltersdorf, W.; Panterodt, T.; Glas, M.; Wasner, M.; Eckey, M.; Drosch, M.; Hollidt, J.-M.; et al. Peptide Microarray-Based Analysis of Antibody Responses to SARS-CoV-2 Identifies Unique Epitopes with Potential for Diagnostic Test Development. *Eur. J. Immunol.* **2021**, *51*, 1839–1849. <https://doi.org/10.1002/eji.202049101>.
85. Lee, Y.-S.; Hong, S.-H.; Park, H.-J.; Lee, H.-Y.; Hwang, J.-Y.; Kim, S.Y.; Park, J.W.; Choi, K.-S.; Seong, J.K.; Park, S.-I.; et al. Peptides Derived From S and N Proteins of Severe Acute Respiratory Syndrome Coronavirus 2 Induce T Cell Responses: A Proof of Concept for T Cell Vaccines. *Front. Microbiol.* **2021**, *12*, 732450. <https://doi.org/10.3389/fmicb.2021.732450>.
86. Joag, V.; Wijeyesinghe, S.; Stolley, J.M.; Quarnstrom, C.F.; Dileepan, T.; Soerens, A.G.; Sangala, J.A.; O'Flanagan, S.D.; Gavil, N.V.; Hong, S.-W.; et al. Cutting Edge: Mouse SARS-CoV-2 Epitope Reveals Infection and Vaccine-Elicited CD8 T Cell Responses. *J. Immunol.* **2021**, *206*, 931–935. <https://doi.org/10.4049/jimmunol.2001400>.
87. Brunk, F.; Moritz, A.; Nelde, A.; Bilich, T.; Casadei, N.; Frasncka, S.A.K.; Heitmann, J.S.; Hörber, S.; Peter, A.; Rammensee, H.-G.; et al. SARS-CoV-2-Reactive T-Cell Receptors Isolated from Convalescent COVID-19 Patients Confer Potent T-Cell Effector Function. *Eur. J. Immunol.* **2021**, *51*, 2651–2664. <https://doi.org/10.1002/eji.202149290>.
88. Heitmann, J.S.; Bilich, T.; Tandler, C.; Nelde, A.; Maringer, Y.; Marconato, M.; Reusch, J.; Jäger, S.; Denk, M.; Richter, M.; et al. A COVID-19 Peptide Vaccine for the Induction of SARS-CoV-2 T Cell Immunity. *Nature* **2022**, *601*, 617–622. <https://doi.org/10.1038/s41586-021-04232-5>.
89. Janice Oh, H.-L.; Ken-En Gan, S.; Bertolotti, A.; Tan, Y.-J. Understanding the T Cell Immune Response in SARS Coronavirus Infection. *Emerg. Microbes. Infect.* **2012**, *1*, e23. <https://doi.org/10.1038/emi.2012.26>.
90. Liu, S.-J.; Leng, C.-H.; Lien, S.-P.; Chi, H.-Y.; Huang, C.-Y.; Lin, C.-L.; Lian, W.-C.; Chen, C.-J.; Hsieh, S.-L.; Chong, P. Immunological Characterizations of the Nucleocapsid Protein Based SARS Vaccine Candidates. *Vaccine* **2006**, *24*, 3100–3108. <https://doi.org/10.1016/j.vaccine.2006.01.058>.
91. Somogyi, E.; Csiszovszki, Z.; Molnár, L.; Lőrincz, O.; Tóth, J.; Pattijn, S.; Schockaert, J.; Mazy, A.; Miklós, I.; Pántya, K.; et al. A Peptide Vaccine Candidate Tailored to Individuals' Genetics Mimics the Multi-Targeted T Cell Immunity of COVID-19 Convalescent Subjects. *Front. Genet.* **2021**, *12*, 684152. <https://doi.org/10.3389/fgene.2021.684152>.
92. Peng, H.; Yang, L.; Wang, L.; Li, J.; Huang, J.; Lu, Z.; Koup, R.A.; Bailer, R.T.; Wu, C. Long-Lived Memory T Lymphocyte Responses against SARS Coronavirus Nucleocapsid Protein in SARS-Recovered Patients. *Virology* **2006**, *351*, 466–475. <https://doi.org/10.1016/j.virol.2006.03.036>.
93. Keller, M.D.; Harris, K.M.; Jensen-Wachspress, M.A.; Kankate, V.V.; Lang, H.; Lazarski, C.A.; Durkee-Shock, J.; Lee, P.-H.; Chaudhry, K.; Webber, K.; et al. SARS-CoV-2-Specific T Cells Are Rapidly Expanded for Therapeutic Use and Target Conserved Regions of the Membrane Protein. *Blood* **2020**, *136*, 2905–2917. <https://doi.org/10.1182/blood.2020008488>.
94. Hu, H.; Li, L.; Kao, R.Y.; Kou, B.; Wang, Z.; Zhang, L.; Zhang, H.; Hao, Z.; Tsui, W.H.; Ni, A.; et al. Screening and Identification of Linear B-Cell Epitopes and Entry-Blocking Peptide of Severe Acute Respiratory Syndrome (SARS)-Associated Coronavirus Using Synthetic Overlapping Peptide Library. *J. Comb. Chem.* **2005**, *7*, 648–656. <https://doi.org/10.1021/cc0500607>.
95. Johansson, A.M.; Malhotra, U.; Kim, Y.G.; Gomez, R.; Krist, M.P.; Wald, A.; Koelle, D.M.; Kwok, W.W. Cross-Reactive and Mono-Reactive SARS-CoV-2 CD4+ T Cells in Prepandemic and COVID-19 Convalescent Individuals. *PLoS Pathog.* **2021**, *17*, e1010203. <https://doi.org/10.1371/journal.ppat.1010203>.
96. de Silva, T.I.; Liu, G.; Lindsey, B.B.; Dong, D.; Moore, S.C.; Hsu, N.S.; Shah, D.; Wellington, D.; Mentzer, A.J.; Angyal, A.; et al. The Impact of Viral Mutations on Recognition by SARS-CoV-2 Specific T Cells. *iScience* **2021**, *24*, 103353. <https://doi.org/10.1016/j.isci.2021.103353>.
97. Chang, C.X.L.; Tan, A.T.; Or, M.Y.; Toh, K.Y.; Lim, P.Y.; Chia, A.S.E.; Froesig, T.M.; Nadua, K.D.; Oh, H.-L.J.; Leong, H.N.; et al. Conditional Ligands for Asian HLA Variants Facilitate the Definition of CD8+ T-Cell Responses in Acute and Chronic Viral Diseases. *Eur. J. Immunol.* **2013**, *43*, 1109–1120. <https://doi.org/10.1002/eji.201243088>.
98. Ma, T.; Ryu, H.; McGregor, M.; Babcock, B.; Neidelman, J.; Xie, G.; George, A.F.; Frouard, J.; Murray, V.; Gill, G.; et al. Protracted yet Coordinated Differentiation of Long-Lived SARS-CoV-2-Specific CD8+ T Cells during Convalescence. *J. Immunol.* **2021**, *207*, 1344–1356. <https://doi.org/10.4049/jimmunol.2100465>.
99. Harndahl, M.; Lamberth, K.; Roder, G.; Justesen, S.; Madsen, M.; Nielsen, M.; Lundegaard, C.; Larsen, M.V.; Tang, S.; Brunak, S.; et al. Large Scale Analysis of Peptide-HLA Class I Interactions (Direct IEDB Submission 1019519). 2010. Available online: <http://www.iedb.org/reference/1019519> (accessed on 7 March 2020).
100. Gupta, V.; Tabiin, T.M.; Sun, K.; Chandrasekaran, A.; Anwar, A.; Yang, K.; Chikhlikar, P.; Salmon, J.; Brusic, V.; Marques, E.T.A.; et al. SARS Coronavirus Nucleocapsid Immunodominant T-Cell Epitope Cluster Is Common to Both Exogenous Recombinant and Endogenous DNA-Encoded Immunogens. *Virology* **2006**, *347*, 127–139. <https://doi.org/10.1016/j.virol.2005.11.042>.
101. Yang, K.; Sun, K.; Srinivasan, K.N.; Salmon, J.; Marques, E.T.; Xu, J.; August, J.T. Immune Responses to T-Cell Epitopes of SARS CoV-N Protein Are Enhanced by N Immunization with a Chimera of Lysosome-Associated Membrane Protein. *Gene Ther.* **2009**, *16*, 1353–1362. <https://doi.org/10.1038/gt.2009.92>.

102. Zhang, J.; Lu, D.; Li, M.; Liu, M.; Yao, S.; Zhan, J.; Liu, W.J.; Gao, G.F. A COVID-19 T-Cell Response Detection Method Based on a Newly Identified Human CD8+ T Cell Epitope from SARS-CoV-2—Hubei Province, China, 2021. *China CDC Wkly.* **2022**, *4*, 83–87. <https://doi.org/10.46234/ccdcw2021.258>.
103. Sylvester-Hvid, C.; Nielsen, M.; Lamberth, K.; Røder, G.; Justesen, S.; Lundegaard, C.; Worning, P.; Thomadsen, H.; Lund, O.; Brunak, S.; et al. SARS CTL Vaccine Candidates; HLA Supertype-, Genome-Wide Scanning and Biochemical Validation. *Tissue Antigens* **2004**, *63*, 395–400. <https://doi.org/10.1111/j.0001-2815.2004.00221.x>.
104. Rasmussen, M.; Harndahl, M.; Kristensen, A.B.; Nielsen, I.K.; Jorgensen, K.W.; Stryhn, A.; Nielsen, M.; Buus, S. Large Scale Analysis of Peptide—HLA-I Stability (Direct IEDB Submissions 1028282, 1028285, 1028287, 1028288, 1028289, 1028290, 1028291, 1028292, 1028293). 2014. Available online: <http://www.iedb.org/reference/1028282> (accessed on 23 April 2020).
105. He, Y.; Zhou, Y.; Wu, H.; Kou, Z.; Liu, S.; Jiang, S. Mapping of Antigenic Sites on the Nucleocapsid Protein of the Severe Acute Respiratory Syndrome Coronavirus. *J. Clin. Microbiol.* **2004**, *42*, 5309–5314. <https://doi.org/10.1128/JCM.42.11.5309-5314.2004>.
106. Arya, R.; Kumari, S.; Pandey, B.; Mistry, H.; Bihani, S.C.; Das, A.; Prashar, V.; Gupta, G.D.; Panicker, L.; Kumar, M. Structural Insights into SARS-CoV-2 Proteins. *J. Mol. Biol.* **2021**, *433*, 166725. <https://doi.org/10.1016/j.jmb.2020.11.024>.
107. Liu, J.; Sun, Y.; Qi, J.; Chu, F.; Wu, H.; Gao, F.; Li, T.; Yan, J.; Gao, G.F. The Membrane Protein of Severe Acute Respiratory Syndrome Coronavirus Acts as a Dominant Immunogen Revealed by a Clustering Region of Novel Functionally and Structurally Defined Cytotoxic T-Lymphocyte Epitopes. *J. Infect. Dis.* **2010**, *202*, 1171–1180. <https://doi.org/10.1086/656315>.
